# Supplementary material for: Changes in Global and Nodal Networks in Patients With Unipolar Depression After 3-Week Repeated Transcranial Magnetic Stimulation Treatment
Source: Front Psychiatry. 2019 Oct 9;10:686. doi: 10.3389/fpsyt.2019.00686 (PMC6794380; doi:10.3389/fpsyt.2019.00686)
Supplement: Supplementary file 1 [file DataSheet_1.xlsx]

## Sheet: Statistics+delta
NO.	AGE	EDU	CLASS_1_conv_2_sham	PHYSICAL	PRE_HAMA	POST_HAMA	PRE_HAMD	POST_HAMD	PRE_STRENGTH	1	2	3	4	5	6	7	8	9	10	11	12	13	14	15	16	17	18	19	20	21	22	23	24	25	26	27	28	29	30	31	32	33	34	35	36	37	38	39	40
2	42	12	1	0	34	29	26	23		33.6368	46.3092	45.7761	27.751	14.1152	26.7012	25.2572	28.4926	25.2989	19.3088	29.3225	29.5926	31.1958	34.9555	25.192	41.2628	46.6726	47.9816	43.7897	43.014	42.9705	42.6434	26.0825	17.4511	44.5652	44.7751	38.057	36.476	44.424	44.4326	45.0048	47.6771	45.908	45.8324	45.6223	44.9	45.6096	45.5559	45.8243	45.3823
3	34	16	1	0	23	10	22	11		23.3596	44.5871	44.4803	24.0436	12.1742	30.2358	15.8933	22.788	32.3176	32.637	32.9293	32.96	28.8818	45.9332	22.484	45.7212	46.4838	47.9438	45.0899	45.1799	45.5131	45.3704	18.8575	43.6918	46.9802	47.0183	46.34	46.2033	47.1299	47.1277	46.6437	47.0168	46.7693	47.0197	46.7237	46.507	46.7426	46.8518	46.8124	46.7799
4	32	12	1	1	25	21	22	16		27.6298	36.6873	35.8645	26.2232	18.1827	29.4599	22.3368	23.1192	30.1934	30.1981	30.4601	30.2154	32.394	39.1619	27.4364	39.6989	39.2882	40.207	37.2866	37.5182	37.7384	37.5187	28.6039	35.0225	39.3055	39.2732	38.3676	37.9259	39.3216	39.3225	39.7634	40.1201	39.28	39.4846	39.6921	39.4855	40.0627	40.2336	40.1559	40.2131
5	23	16	1	3	10	13	9	7		18.0498	38.405	38.2631	23.1326	11.7391	20.5079	16.7098	17.2511	19.0477	18.7805	18.8327	18.8251	19.848	36.8948	21.5512	34.3173	31.9615	38.8605	37.9481	38.0268	38.061	37.9855	14.0936	28.0578	36.6329	37.5186	35.1803	35.1244	36.977	37.135	33.1726	38.9122	38.821	38.8461	38.8654	38.8232	38.8093	38.2542	38.5176	37.8151
6	48	12	1	4	35	19	32	13		29.6311	42.2033	40.8435	37.1093	15.3123	34.2693	27.864	25.952	36.4649	35.5893	37.9725	39.218	37.3037	43.398	31.9876	46.3204	47.717	47.4446	46.1238	45.6247	47.5111	47.2976	31.0536	40.3246	46.1706	46.448	44.7333	43.6067	46.2772	46.4389	45.6417	47.6311	48.5548	49.1693	48.0009	47.4659	47.7867	47.5999	47.8409	47.1853
18	60	12	1	3	26	14	27	16		23.0833	37.0224	37.1791	32.3838	15.5893	31.0986	34.4132	33.3707	34.0872	34.785	34.6754	34.4144	25.3189	41.2308	17.7834	37.0912	37.0911	42.3244	36.174	36.0313	36.0932	35.7207	23.1107	32.6646	42.0223	42.0625	37.0195	37.962	41.8411	41.8864	39.5181	40.6038	40.5423	40.8893	40.9041	40.3401	40.7529	41.1374	40.7674	41.0022
21	19	12	1	4	30	24	23	22		23.2995	39.2317	39.7896	13.5626	13.3033	21.8146	31.1627	34.5678	24.4486	25.031	24.4739	24.439	33.4287	41.2009	19.0805	37.3819	37.7495	42.4204	38.4726	38.9071	38.8314	38.7273	29.1171	40.2077	42.2771	42.3179	40.747	40.7971	42.2361	42.257	42.4265	42.2092	42.6036	42.7657	42.7355	42.596	42.8901	42.8572	42.9228	42.9037
23	29	12	1	3	12	12	17	18		31.9944	35.9258	30.5984	33.0492	19.8499	31.2708	25.8824	28.3202	30.2141	29.0789	31.0455	30.0076	39.928	42.4493	23.2592	40.9158	37.5245	40.7236	39.4475	38.1493	39.5905	39.2003	16.8857	41.4403	42.9022	43.066	43.2861	43.2384	43.2659	43.1407	38.6629	39.2848	40.3511	41.3969	41.5798	40.0328	40.4898	42.3508	44.9048	44.4126
27	37	14	1	0	19	16	19	15		30.788	32.3921	30.1117	29.6848	15.2635	29.3197	30.2865	40.1325	34.4308	34.3207	34.4523	34.5101	34.8643	36.7711	29.5267	43.1025	42.4441	42.6874	37.5018	36.8078	38.5096	38.085	16.9712	34.5559	40.9907	41.0073	38.4894	37.5088	40.9972	41.0139	41.4983	38.0013	39.7016	40.9817	40.1496	39.2779	40.6083	40.6214	40.7084	40.5289
31	25	12	1	1	11	12	15	21		10.7114	33.8199	32.6001	18.8858	29.4809	23.9074	27.7876	28.8973	28.3006	29.2418	28.5812	28.3183	23.4442	30.4092	18.7099	18.644	24.5754	35.5084	34.6754	33.4044	33.5477	33.6683	16.7661	17.1345	19.351	18.9112	20.2956	18.7448	19.1247	19.1622	23.6399	34.4528	35.64	35.5106	35.4614	35.4824	35.3933	34.8067	34.9773	35.0307
33	24	12	1	4	17	9	15	6		31.724	26.5977	38.0286	38.2898	33.5884	33.8096	36.1094	35.6887	35.7513	35.6369	35.7051	35.8037	35.6059	33.8868	31.1875	35.404	35.7372	34.8424	35.428	35.2875	35.6784	35.6754	34.6284	34.6352	32.423	37.3241	34.981	24.1377	35.3645	36.3926	37.5448	34.8865	34.993	35.4072	35.7402	35.2688	34.9752	34.5586	33.1741	36.1564
36	46	12	1	4	22	15	21	14		27.7203	35.5962	35.6634	26.1782	10.7024	19.2929	18.9463	24.3406	26.3846	26.9069	25.0902	19.0078	17.5993	18.2767	24.1199	37.548	36.4721	37.4734	34.4772	35.1026	35.5151	35.2628	16.9386	24.2916	32.4562	33.5267	27.0258	24.6954	32.2361	32.8743	35.6085	37.418	37.5907	37.7999	37.4653	36.9988	37.6834	37.8406	37.4032	37.0068
39	19	12	1	3	26	14	24	11		27.4448	42.6599	43.1239	19.2136	12.5492	16.1485	23.1485	28.7	16.0291	15.9224	16.0614	16.2362	35.4436	43.2854	17.231	41.9399	44.2875	45.051	42.034	42.1454	42.2697	42.1049	35.1259	36.221	44.7084	44.7341	42.7574	42.9969	44.6702	44.6893	44.4993	44.7859	44.8085	44.9666	44.8972	44.7475	45.0956	45.1243	45.0875	45.0901
42	36	16	1	5	25	13	21	13		35.4346	32.9191	39.116	29.3823	37.1709	25.1289	22.2673	36.0177	38.5275	38.5056	37.4131	36.0376	39.0797	20.0449	25.8522	20.1242	38.5337	27.8874	39.3406	37.0928	36.8617	36.7757	15.8297	19.4913	21.2251	19.7039	19.8886	20.1412	20.0815	19.9481	39.4468	34.0472	38.5587	38.1584	37.0584	33.6462	39.8379	39.1825	39.4358	39.162
45	28	14	1	0	26	23	20	15		24.9728	29.5945	33.4565	30.4641	35.9875	31.8008	32.3668	33.1083	32.5611	32.6423	36.7972	38.0668	20.0028	21.1433	10.7932	21.4537	21.8798	30.5886	22.6267	22.6856	22.8489	22.8455	15.9794	22.9784	27.0337	26.327	22.976	24.9693	29.6908	29.0209	28.7822	35.4324	33.2787	32.7518	32.8355	31.5406	20.8062	36.4076	22.6102	29.9144
48	62	16	1	4	22	9	18	9		33.0009	34.8607	38.5315	39.0063	23.1898	23.6184	47.4834	47.2535	44.9485	45.3415	28.0098	18.0321	24.178	45.8999	32.9772	46.2281	39.4629	38.1626	39.5314	41.3575	41.1368	40.9269	43.8377	47.4462	47.2048	47.4921	47.042	47.3992	47.109	47.2254	47.9536	44.3397	47.5596	47.7387	47.581	47.43	47.6404	47.2359	47.8949	46.9609
52	28	14	1	0	25	32	24	32		29.791	37.6023	36.8107	33.4551	11.8235	28.8101	33.7943	31.8773	37.6791	37.2031	37.924	37.9962	37.4522	44.3376	30.9875	42.1468	47.0117	46.4223	42.972	42.9164	43.8522	43.6711	37.5438	37.3976	44.5788	44.4966	42.6557	42.1323	44.8376	44.8126	45.4207	43.8064	43.9703	44.7971	44.3108	43.8016	44.8009	44.7479	44.7775	44.7129
54	23	14	1	1	23	24	25	21		38.9131	41.4204	43.5402	40.1709	18.1816	33.6227	39.6279	42.604	34.7749	34.3569	34.5274	33.9198	37.3946	49.0702	20.2573	40.8897	42.8347	47.9866	42.6747	42.9351	42.9749	42.9194	34.8429	46.0618	48.9499	48.9306	48.4864	48.6189	48.9943	48.9798	48.853	47.228	48.1985	48.6026	48.4962	48.2591	48.9604	48.8562	48.82	48.7746
55	22	12	1	4	35	10	19	11		9.8745	27.8743	33.9849	26.8555	11.1955	10.0192	20.4897	22.3615	28.5861	32.3995	29.509	27.3705	29.2377	36.8317	16.9394	21.8251	19.5297	38.8824	38.9927	37.8939	38.4006	38.5099	17.2774	19.0543	31.6079	34.2006	27.7042	26.8626	34.884	35.4088	8.55377	38.0304	37.9759	38.032	38.78	38.569	37.8676	35.7315	37.7382	36.9759
7	37	16	2	0	35	30	29	29		34.6228	45.4536	44.8715	13.6213	17.3577	21.0816	20.0655	39.4776	24.2804	24.3811	26.6002	26.0725	22.4865	47.0233	19.5783	46.1727	46.3847	47.6046	44.5367	44.5427	44.5732	44.448	25.3498	46.0546	47.076	47.2083	45.5769	46.0021	47.0742	47.0977	47.1551	47.3316	46.9702	47.1201	46.9743	46.7471	47.0918	47.1733	47.1696	47.1615
10	41	16	2	2	22	19	21	22		29.1757	47.8463	48.1885	40.0641	17.857	22.4431	32.1369	36.706	18.785	18.5049	18.2682	18.0229	39.751	48.2621	23.8709	45.3574	47.5824	49.3005	47.3215	47.4014	47.5009	47.443	33.9023	45.0034	47.7308	47.8321	46.2874	46.534	47.9736	48.003	48.2058	48.752	49.2965	49.4219	49.4814	49.4099	49.5381	49.42	49.5199	49.4934
12	27	16	2	0	21	9	23	14		43.1038	44.7608	45.0585	39.6549	21.2545	32.2449	34.2331	45.7789	31.125	31.3887	31.0684	31.3062	47.2791	50.1208	31.4005	47.9974	51.4373	50.3385	46.4898	45.9585	46.3627	46.1642	44.6111	46.1583	49.9765	49.9159	48.564	48.5814	49.9464	49.9208	50.8945	48.1959	47.9102	48.5453	48.3019	47.8312	48.982	48.6505	48.9025	48.7866
16	61	6	2	5	29	22	16	13		21.6817	42.9558	41.9217	14.9503	7.65678	13.2607	22.0707	20.1851	24.8626	25.4752	24.9112	24.7596	24.9708	42.8119	26.4608	44.2755	43.5093	44.9764	44.9255	44.8347	45.068	44.9481	19.1369	29.8359	40.9563	41.1819	38.5243	40.0484	42.3641	42.3164	42.0707	44.1624	45.2649	45.5117	45.2634	45.1031	45.2655	45.2091	45.3092	45.1964
17	32	16	2	3	16	9	21	11		17.0424	37.1003	36.2156	22.8728	18.8557	15.7209	18.0485	26.8954	24.1591	20.3232	27.3781	26.4721	26.023	30.9459	19.9093	41.156	37.4513	38.6873	39.2843	39.8414	40.4352	40.213	21.3445	34.8078	40.8449	40.9092	36.4298	35.877	40.2398	40.3105	40.7377	40.5933	41.6614	42.278	42.121	41.6116	42.8221	42.5011	43.0494	42.7677
20	51		2	0	32	25	25	19		34.9938	46.0012	47.3581	34.2699	14.4328	23.7087	33.0869	38.3572	31.3355	30.5914	30.4467	29.8092	37.0562	41.5993	23.8477	41.2809	47.4954	49.4278	45.566	45.4646	45.3581	45.0987	34.0838	44.0512	46.6475	46.8107	43.203	42.4719	46.8838	46.9676	47.0848	48.8203	49.3201	49.5312	49.4008	49.1514	49.564	49.5407	49.5346	49.5064
22	33	12	2	0	30	26	25	23		35.912	35.4893	38.1694	31.1561	15.9694	16.1459	24.0031	22.469	16.2924	17.0096	24.5285	25.951	31.2168	31.4641	23.1349	34.0663	40.7752	42.5103	31.0034	31.4206	32.4443	31.671	35.0191	27.2302	42.1742	42.3077	39.0916	37.4908	42.1216	42.3324	43.1415	40.3138	40.5141	41.1027	40.6781	40.1204	40.0259	39.5622	39.93	39.6325
25	25	14	2	3	15	12	12	8		26.6147	41.4139	47.4951	47.5186	30.4109	48.0393	47.4259	47.3518	47.6627	48.3164	47.5718	47.3618	30.891	47.717	22.8745	29.0632	29.2766	47.8973	41.6974	48.8985	48.7743	48.7751	19.054	23.832	40.1065	49.9613	27.0769	28.3043	43.7437	47.7368	27.8974	49.2536	49.3395	49.4394	49.0117	49.3183	34.5639	49.652	49.7449	49.8523
29	35	14	2	3	18	11	16	13		19.8256	25.9931	43.2296	43.3632	34.8208	13.4926	17.191	18.0884	31.9465	35.7651	40.6161	39.6562	31.5489	29.3709	17.0962	17.6399	35.3943	37.2763	45.1277	43.7115	43.7983	43.7727	14.4318	18.1241	43.0779	44.9268	19.7293	19.6637	23.5354	33.3	36.4994	41.8574	43.379	43.4946	43.7704	43.0553	44.9642	43.9908	44.7632	44.2921
32	22	12	2	4	29	14	23	14		29.9005	40.0283	39.8242	13.471	11.9087	21.2293	28.5452	31.082	21.5864	21.3964	20.7903	20.6293	31.4872	41.6059	15.7039	41.665	40.328	43.3712	41.7071	41.8152	42.0224	41.948	15.5723	37.4903	42.3568	42.3917	41.3729	41.4819	42.6189	42.6146	41.6715	42.6342	43.0407	43.3373	43.3162	43.057	43.4834	43.5966	43.5452	43.6057
41	32	14	2	3	23	16	23	15		18.9667	17.8181	25.6151	31.7827	11.2218	22.4297	25.8737	25.9256	31.2057	27.8067	32.4438	32.8907	27.318	21.2096	18.7863	13.2616	28.517	23.7103	32.3624	32.0863	32.2218	32.148	18.13	19.7172	29.7797	33.5014	21.2887	21.1164	21.6571	22.5663	26.6214	29.6115	30.5136	30.8811	31.3808	29.7711	31.6487	32.3409	32.8281	32.6705
43	53	12	2	3	16	8	13	9		14.4278	25.3566	28.6881	32.6058	16.891	22.4338	17.6982	20.1715	26.6164	26.349	37.3438	36.9495	21.0552	24.5672	14.9019	17.5213	22.1052	29.6538	37.3517	37.4203	37.32	37.2107	15.4128	15.6278	28.0842	38.9809	18.8405	19.2636	21.6522	31.9895	21.0122	33.7054	35.8897	35.9931	35.4083	35.3378	37.9001	37.6253	38.2621	38.4225
47	24	12	2	0	23	18	21	12		21.9739	45.7231	45.6232	24.1666	15.6598	24.3674	21.6721	33.685	23.7444	24.71	24.3153	23.9564	28.7575	43.9276	20.9647	44.6673	40.1482	47.2094	44.3399	44.3855	44.4809	44.406	19.1848	41.5821	45.5833	45.8282	42.548	43.3799	45.5327	45.6051	44.6321	47.4108	46.9292	47.0505	47.0129	46.7651	47.0737	47.0365	47.0794	46.8825
51	21	12	2	2	23	22	23	22		27.8351	42.2374	41.06	21.3546	13.1154	29.5511	39.7262	39.2584	34.4332	32.8998	35.146	35.022	38.8901	45.9486	14.8534	46.7879	45.8615	47.4351	43.9107	43.9313	44.5904	44.5095	32.612	41.8967	47.4697	47.4297	46.1524	45.786	47.5928	47.5845	47.7354	45.9618	46.9965	47.6584	47.3918	47.1611	47.6785	47.6611	47.755	47.4208
53	24	12	2	3	8	12	11	16		24.3041	40.3061	38.379	12.1606	12.8943	22.1668	27.4664	34.3306	19.7147	17.1352	19.6568	14.3721	30.9806	45.7506	24.3157	45.1953	45.4267	46.0043	42.8965	43.3298	43.8024	43.6603	25.4407	36.9531	45.5247	45.4877	44.156	43.5464	45.7443	45.7312	46.1849	45.2859	46.2383	46.6358	46.4396	46.1676	46.5801	46.6513	46.6071	46.5891
56	42	16	2	3	8	5	7	6		11.0718	30.5032	29.5656	13.2301	13.0157	21.0131	27.0488	27.2786	21.1666	21.3794	21.6242	21.6468	15.7197	24.1924	20.3744	32.3636	15.0551	33.425	29.5846	29.5336	30.3078	30.1139	26.1444	29.0465	32.5119	32.543	30.7279	29.8441	32.475	32.5133	32.8787	32.9109	33.2042	33.5458	33.4073	33.0301	33.7111	33.6039	33.7586	33.7257
[truncated: 519 more columns]

## Sheet: statstics_theta
NO.	AGE	EDU	CLASS_1_conv_2_sham	PHYSICAL	PRE_HAMA	POST_HAMA	PRE_HAMD	POST_HAMD	PRE_STRENGTH	1	2	3	4	5	6	7	8	9	10	11	12	13	14	15	16	17	18	19	20	21	22	23	24	25	26	27	28	29	30	31	32	33	34	35	36	37	38	39	40
2	42	12	1	0	34	29	26	23		30.2633	44.5294	44.0767	20.7773	18.0219	21.496	24.294	28.0019	24.6002	23.6619	27.2626	27.7804	29.1307	32.3998	27.2097	40.0151	45.6478	46.2438	40.8666	40.2858	40.2727	40.0315	23.799	21.6382	42.418	42.6186	35.6259	33.9217	42.1755	42.1792	42.405	45.791	43.8712	43.832	43.6029	42.7359	43.62	43.6538	43.8694	43.4518
3	34	16	1	0	23	10	22	11		28.0929	45.6606	45.6431	30.6393	17.2235	30.7492	22.7921	17.9107	36.9211	37.0564	37.2476	37.2754	37.0508	48.0072	28.8377	45.9054	49.0839	49.607	45.5943	45.8376	46.1691	45.9642	21.9421	44.7579	48.4725	48.5307	47.6424	47.4382	48.6399	48.6475	48.3016	48.6718	48.2444	48.5927	48.2217	47.9134	48.2753	48.5082	48.3967	48.3967
4	32	12	1	1	25	21	22	16		25.4556	38.7215	38.0246	19.4693	15.1882	29.373	21.9137	24.4368	31.1967	30.9398	31.4506	31.272	31.6102	38.7725	26.4784	40.4323	39.2625	40.5149	38.5159	38.4688	38.6562	38.5233	28.4784	35.1136	39.432	39.4325	38.4597	38.0928	39.5121	39.5147	39.1771	40.6867	40.0429	40.1651	40.3279	40.1811	40.533	40.5711	40.5531	40.5113
5	23	16	1	3	10	13	9	7		20.0241	37.602	37.2886	16.8998	10.3574	19.543	18.5332	16.431	21.3726	21.1952	21.2994	21.3013	22.7885	35.1279	22.3822	32.969	33.8278	38.3979	37.1584	37.5484	37.501	37.3507	15.998	24.7792	36.5389	37.1197	33.7222	33.2864	36.7928	36.921	34.2076	38.3988	38.5685	38.6185	38.6301	38.5747	38.6393	38.1322	38.4232	37.758
6	48	12	1	4	35	19	32	13		34.5645	45.045	44.2342	37.3276	15.1209	36.6002	35.4922	34.938	41.4366	40.8132	42.3594	43.2668	40.9879	45.4553	36.969	48.6207	50.8436	49.4973	48.3478	48.0824	49.4318	49.2815	38.4538	43.1764	48.1188	48.2531	47.3135	46.1191	48.2294	48.3007	48.9089	49.2561	50.2664	50.854	49.7467	49.3441	49.5398	49.408	49.5783	49.1173
18	60	12	1	3	26	14	27	16		25.7254	38.6825	38.6986	35.4694	18.8118	31.9031	36.6027	35.6296	35.6749	36.3905	36.5099	36.3728	28.173	43.8664	23.0868	40.1249	41.0389	44.2985	38.5759	38.2123	38.3002	37.9388	24.3706	34.2305	44.2951	44.3201	40.571	41.145	44.2309	44.2563	43.0658	42.7082	42.7219	43.0832	43.0111	42.4554	42.9166	43.3183	42.9634	43.127
21	19	12	1	4	30	24	23	22		26.4665	37.2995	37.0373	18.7641	14.0662	24.9549	26.3518	30.1669	19.649	19.9352	19.6503	19.662	33.0393	40.1411	18.6296	37.074	38.9211	41.5658	35.8932	36.6611	36.643	36.3912	26.5201	38.067	41.1448	41.1738	39.4994	39.6374	41.1833	41.1872	41.4392	41.0678	41.2651	41.4679	41.4172	41.1942	41.5736	41.7437	41.6582	41.7392
23	29	12	1	3	12	12	17	18		29.7937	36.32	32.1707	32.6986	25.396	32.788	22.8235	21.6873	29.2623	28.2594	30.0997	28.8051	37.7285	39.1098	26.5896	39.3417	36.8972	40.6248	37.7928	36.9003	38.0948	37.7436	16.3483	38.3792	41.4251	41.599	41.4491	41.0895	41.8146	41.6776	38.2527	39.4897	39.8711	40.7145	40.7138	39.3503	39.34	42.9473	45.3102	44.7485
27	37	14	1	0	19	16	19	15		30.363	30.7404	28.704	28.7982	18.2119	26.9137	31.9841	41.1716	36.3727	36.0304	36.3855	36.5441	35.2347	38.0016	29.7559	42.488	43.5659	41.801	36.5289	36.1997	37.7067	37.3146	16.9102	34.7097	42.1477	42.1546	40.0255	38.8092	42.1674	42.1737	42.7179	36.367	38.845	40.1183	39.2985	38.4746	39.7025	39.8662	39.8652	39.7429
31	25	12	1	1	11	12	15	21		7.10265	28.5388	27.7082	17.0021	23.8696	17.6452	20.7417	21.9307	21.2417	22.154	21.4701	21.3101	20.1046	28.7387	16.0489	18.1065	18.4393	30.5983	31.2843	29.079	29.517	29.8461	12.4087	17.4951	17.5011	18.2975	15.6863	18.9552	18.0832	18.121	15.6613	30.049	32.1294	32.0444	32.1241	32.2829	31.7033	30.89	31.1186	31.26
33	24	12	1	4	17	9	15	6		22.5924	23.5974	26.2364	28.2916	26.1766	31.2693	32.9875	32.8079	32.1326	32.0848	32.0894	32.1078	18.8509	25.4511	28.464	31.5383	27.8959	26.8563	26.8621	27.8765	27.9976	27.9704	31.9281	28.9332	20.5795	29.3418	29.0776	24.8009	24.4985	27.5053	24.0576	27.4509	27.4837	27.4811	28.0112	27.5263	26.7389	28.2488	28.3275	27.9035
36	46	12	1	4	22	15	21	14		24.0376	36.1	35.496	22.5684	10.3143	20.0907	16.5258	22.3524	27.3664	28.4157	23.7012	16.5878	21.0869	19.655	26.0169	38.0436	38.3168	39.2416	34.2288	34.592	35.1223	34.7677	14.565	21.1678	36.0645	36.5637	31.208	28.7511	35.9672	36.333	37.8203	38.6022	37.8809	38.2171	37.6199	36.9007	38.1573	38.3538	37.7538	37.6215
39	19	12	1	3	26	14	24	11		21.8867	42.399	42.2781	18.7518	11.9981	15.8606	15.5576	21.0582	17.6165	18.0502	17.7568	17.6223	33.9379	42.0496	21.7691	41.7646	45.2147	45.3387	41.2474	41.1502	41.4303	41.2093	34.0422	33.7849	43.9757	43.9292	40.7418	40.9045	44.0314	44.0209	44.1868	45.0198	44.5285	44.6957	44.5047	44.2515	44.7068	44.7607	44.6918	44.6163
42	36	16	1	5	25	13	21	13		30.4769	27.1454	34.0153	26.183	30.2327	23.1691	15.9787	29.9599	32.9177	32.9594	29.9042	27.2357	33.1196	22.62	24.3802	23.3217	33.0874	24.7674	33.6403	31.4901	31.2642	31.1783	7.05636	22.6763	23.4049	22.5814	22.8559	22.9882	22.9199	22.8339	33.6076	28.2744	33.8011	33.508	30.5994	27.3888	34.1693	33.9474	33.769	33.603
45	28	14	1	0	26	23	20	15		26.1362	30.3684	32.91	29.6814	36.9853	33.4591	34.0538	34.7404	34.5019	34.5514	37.5745	38.3482	17.2084	21.8659	11.4473	22.5135	22.2157	32.5329	20.537	19.7513	19.9604	20.0138	18.7595	22.8069	27.5694	26.8223	24.0723	24.786	29.0772	28.5647	30.2559	34.2574	30.9052	30.32	30.3375	29.0985	18.0547	34.9459	23.2556	27.8485
48	62	16	1	4	22	9	18	9		24.8849	34.7936	37.4505	40.7825	26.7516	21.1941	46.5329	46.2139	43.3312	44.6226	28.6933	22.972	11.4955	45.6993	25.4254	45.9575	38.7126	38.3829	38.6111	41.0526	40.6353	40.338	41.6583	46.659	47.2689	47.4117	47.1226	47.3154	47.14	47.181	47.7602	44.3745	47.6778	47.8907	47.7691	47.6577	47.845	47.695	48.0629	47.5664
52	28	14	1	0	25	32	24	32		28.6055	40.6124	39.6754	33.1795	10.2816	32.7971	37.0587	33.7515	40.7283	40.4991	41.1673	41.2625	38.1526	46.584	37.4782	44.8205	49.2195	48.355	45.263	45.0958	46.0178	45.8289	39.5903	40.7202	46.768	46.705	44.9787	44.7633	46.973	46.9682	47.3444	46.5298	46.6238	47.2101	46.7673	46.4058	47.1858	47.191	47.1695	47.0976
54	23	14	1	1	23	24	25	21		36.019	41.854	43.1067	38.5129	20.3794	34.7174	30.0642	35.8606	22.3995	21.7041	22.3723	21.8818	30.7693	47.6195	25.1682	41.6005	43.4539	46.6615	42.5887	42.9187	43.0573	42.9639	21.4968	43.4177	47.5541	47.5403	46.6911	46.9174	47.5755	47.564	47.5047	46.2644	47.0091	47.3748	47.1659	46.9793	47.5731	47.5391	47.4692	47.4446
55	22	12	1	4	35	10	19	11		17.4354	26.2061	34.7297	29.0689	17.1903	11.012	26.1142	28.8088	34.953	38.0733	35.8317	33.9556	29.7627	41.3034	18.0446	27.9986	25.8174	41.4379	41.8295	41.7	42.4215	42.5548	12.7345	28.4413	38.593	40.3529	29.3058	34.7314	40.3528	40.5545	12.051	41.3455	41.4307	41.6314	42.1819	42.0206	41.4756	39.9382	41.3907	41.0471
7	37	16	2	0	35	30	29	29		30.421	44.8702	44.2848	14.9635	14.2336	23.1007	21.1982	36.8997	24.1944	24.168	25.985	25.5552	21.7431	46.0716	21.3815	45.1913	46.0035	47.0172	43.7941	43.8491	43.8235	43.6596	23.761	44.2643	45.9977	46.11	44.4937	44.6757	46.0354	46.0484	46.1186	46.7766	46.4501	46.578	46.4305	46.2448	46.5268	46.636	46.6085	46.6176
10	41	16	2	2	22	19	21	22		34.9395	48.1799	48.5079	42.0009	21.9423	15.0742	30.8308	35.3582	16.6352	16.3092	15.8924	15.6395	44.0755	48.8215	24.7205	45.6637	48.2324	49.3352	47.5177	47.5032	47.654	47.6238	35.0453	46.6121	48.3608	48.4232	47.7681	47.7268	48.5625	48.578	48.7902	48.8459	49.4056	49.5618	49.5865	49.4883	49.6522	49.576	49.6315	49.6141
12	27	16	2	0	21	9	23	14		34.9395	48.1799	48.5079	42.0009	21.9423	15.0742	30.8308	35.3582	16.6352	16.3092	15.8924	15.6395	44.0755	48.8215	24.7205	45.6637	48.2324	49.3352	47.5177	47.5032	47.654	47.6238	35.0453	46.6121	48.3608	48.4232	47.7681	47.7268	48.5625	48.578	48.7902	48.8459	49.4056	49.5618	49.5865	49.4883	49.6522	49.576	49.6315	49.6141
16	61	6	2	5	29	22	16	13		23.0934	44.7692	44.6866	19.9731	6.64769	17.5077	12.7925	16.6173	23.6434	24.878	23.9871	23.6159	26.1526	45.9484	20.9974	45.4771	46.1826	46.7281	45.3046	45.4122	45.4594	45.3035	11.8398	38.4215	45.2071	45.3579	43.8671	44.8659	45.5342	45.5545	45.4585	46.5077	47.0553	47.1952	47.0891	46.9527	47.0636	47.1605	47.1485	47.1349
17	32	16	2	3	16	9	21	11		14.652	38.7218	38.0966	26.3409	9.77933	11.9739	20.4406	31.1301	26.5152	21.7747	30.8676	29.4684	29.8081	35.9133	21.2333	42.246	38.6347	42.2333	40.5419	41.0993	41.5928	41.3691	22.5502	37.9139	43.5256	43.6117	40.3646	39.886	43.1902	43.2543	43.595	43.2241	44.1977	44.7789	44.6525	44.1802	45.3144	44.9611	45.3744	45.1035
20	51		2	0	32	25	25	19		35.9053	48.3769	49.8946	37.4814	21.7679	25.8172	32.8592	38.0362	32.1593	31.493	31.3897	30.6929	41.5078	46.8033	24.9448	43.328	49.8327	51.416	47.2102	47.0388	46.8131	46.587	38.8904	47.1997	50.0026	50.0667	47.613	47.124	50.1647	50.2008	49.4769	50.6124	50.8879	51.129	51.0654	50.8182	51.2438	51.1905	51.1927	51.1421
22	33	12	2	0	30	26	25	23		37.8336	37.9502	40.7122	29.4642	18.6455	19.5875	24.4022	22.7319	18.7495	19.4984	24.8899	25.3765	32.6639	31.7936	29.6985	35.8624	42.6694	43.6149	34.2826	34.6381	35.5234	34.8312	36.4145	27.1831	43.8345	43.9389	40.504	38.6821	43.7594	43.9487	44.5863	41.6552	41.8053	42.3399	41.9419	41.5317	41.4786	41.1373	41.426	41.2022
25	25	14	2	3	15	12	12	8		26.5532	30.1018	37.1479	37.6899	28.7287	38.8639	38.3369	38.2702	38.6472	39.8085	38.8646	38.6287	28.2495	39.3817	15.4715	16.9943	28.7219	39.6597	34.3603	41.47	41.3575	41.3455	12.7533	14.5914	27.6011	42.7798	17.5924	18.8123	31.7637	37.3845	28.8317	41.9097	41.9423	41.9942	41.5446	41.9453	31.3594	41.9773	42.3054	42.4425
29	35	14	2	3	18	11	16	13		16.1619	25.8419	37.261	38.5679	22.7212	6.88109	20.2602	21.4183	28.0408	30.9687	37.0543	35.2919	26.5003	27.5875	14.2522	16.5083	29.2372	33.6188	40.9318	39.6931	39.8112	39.7742	14.6436	20.8525	37.8751	40.8476	22.2669	22.3335	23.8037	27.2966	30.7555	37.2127	38.9077	39.1136	39.4535	38.5952	40.6399	39.8722	40.6524	40.1213
32	22	12	2	4	29	14	23	14		25.1736	41.6405	41.2403	8.51062	14.7898	20.4844	18.2616	22.4011	19.0686	19.2316	19.5289	19.6908	30.1952	42.3199	23.2363	42.6002	41.8249	44.1675	42.1518	42.1403	42.3483	42.254	19.7306	35.7709	41.5937	41.5973	39.7999	39.7292	41.8594	41.8379	41.214	43.6135	43.545	43.7814	43.6804	43.4397	43.9285	43.9543	43.9579	43.9585
41	32	14	2	3	23	16	23	15		10.4411	15.4893	24.6942	34.403	10.364	24.1039	27.8386	26.7709	33.0253	30.0217	34.7226	35.8525	26.8777	20.4233	10.0273	12.6211	29.2707	24.6434	35.0776	34.1653	34.3111	34.2283	15.8233	17.4403	32.6942	36.0107	20.3093	19.8832	22.9742	24.9074	28.8107	31.327	32.6688	33.0876	33.6118	31.9804	34.5626	34.3833	35.5795	34.8047
43	53	12	2	3	16	8	13	9		17.8152	29.5926	26.6914	25.3344	13.1174	20.5039	17.1288	17.2966	21.1267	24.0826	32.4762	33.4756	22.5551	29.6007	17.1269	24.7529	21.1804	31.9147	35.6722	35.6742	35.8265	35.8764	17.6754	20.3293	18.9173	35.7302	23.3632	25.596	21.3957	21.4349	23.4633	33.7614	35.1682	35.1928	34.8989	34.9931	35.1064	35.035	34.8612	35.7051
47	24	12	2	0	23	18	21	12		20.6402	43.0796	43.0196	22.4124	11.103	27.7772	18.7863	28.6133	24.1283	24.9819	24.5499	24.2879	27.4303	41.4114	19.8626	41.6853	39.0613	45.3973	41.3531	41.2989	41.4765	41.3637	16.9866	38.0157	43.396	43.6631	39.41	40.3657	43.3084	43.384	42.434	45.4451	44.9959	45.1421	45.1127	44.8333	45.1669	45.1013	45.1629	44.9557
51	21	12	2	2	23	22	23	22		26.8881	41.0367	40.1481	25.0593	13.4314	28.4247	35.024	35.1716	32.8501	31.0772	33.715	33.7174	37.1488	44.0109	21.5735	45.5797	45.586	47.2221	43.6693	43.8337	44.4589	44.3801	30.0378	40.0162	46.3679	46.3451	44.4478	43.9057	46.4775	46.478	46.4272	45.4716	46.7512	47.3861	47.0948	46.8942	47.2847	47.3744	47.3046	47.0974
53	24	12	2	3	8	12	11	16		22.131	41.599	40.6604	15.2527	9.6533	20.7233	28.0279	34.7233	21.2088	17.7147	20.9082	14.654	28.6224	45.655	26.6064	46.1917	45.5146	46.4662	44.3479	44.7048	45.0173	44.9333	25.143	38.5503	45.9012	45.9144	43.9142	43.2908	46.0831	46.0893	46.4267	45.861	47.0001	47.3797	47.2713	47.0767	47.4842	47.4184	47.461	47.4441
56	42	16	2	3	8	5	7	6		12.472	31.1795	30.4935	11.8954	12.1786	23.4109	24.2213	25.3961	24.927	25.0907	25.3054	25.3408	17.2384	25.0373	23.8272	34.0762	22.8574	35.3099	31.557	31.2706	32.0189	31.8575	23.6982	28.7024	33.9192	33.9591	31.3811	30.7722	33.8891	33.9236	34.7661	34.2371	34.7106	35.047	34.9898	34.6098	35.1072	35.1578	35.2539	35.2163
[truncated: 519 more columns]

## Sheet: statistics_alpha
NO.	AGE	EDU	CLASS_1_conv_2_sham	PHYSICAL	PRE_HAMA	POST_HAMA	PRE_HAMD	POST_HAMD	PRE_STRENGTH	1	2	3	4	5	6	7	8	9	10	11	12	13	14	15	16	17	18	19	20	21	22	23	24	25	26	27	28	29	30	31	32	33	34	35	36	37	38	39	40
2	42	12	1	0	34	29	26	23		33.8502	45.1249	44.3932	21.7921	19.8156	20.7237	25.242	29.2404	24.9917	23.1359	27.8888	28.3158	32.2635	35.5983	30.5321	41.8536	46.7689	47.2634	41.5976	40.8888	40.9785	40.7158	25.7618	21.4689	44.7576	44.8844	38.9217	37.1173	44.6416	44.6397	45.1773	46.5828	44.5336	44.4761	44.1703	43.3273	44.1664	44.2587	44.4322	44.0442
3	34	16	1	0	23	10	22	11		33.4	46.7573	46.7865	27.7892	15.8038	27.2185	24.3295	17.2919	35.4779	35.4921	35.6638	35.727	39.5891	49.1597	30.6031	47.1132	49.5466	49.8667	47.0031	47.1761	47.4587	47.3006	27.761	46.1378	49.5757	49.6119	49.1716	49.0476	49.6974	49.7099	49.5637	49.042	48.9556	49.2171	48.901	48.6747	48.8755	49.0782	48.976	48.967
4	32	12	1	1	25	21	22	16		29.5983	40.8051	39.905	23.8755	15.4581	29.4308	22.06	19.8856	36.0246	35.7257	36.2512	36.1142	36.156	41.6038	32.6552	43.2195	42.6777	43.2213	40.6794	40.5588	40.8359	40.6811	33.4404	35.0578	41.9467	41.8533	40.6584	40.0345	42.1165	42.1105	42.5202	43.1915	42.2112	42.3615	42.6198	42.4084	42.8834	42.8849	42.9045	42.8029
5	23	16	1	3	10	13	9	7		17.4906	38.7707	38.3923	18.2581	10.1491	16.4709	22.4034	20.6898	25.1911	25.068	25.1401	25.1459	20.8737	36.4267	24.5776	34.4962	34.5846	39.4242	38.4372	38.6286	38.6591	38.5393	20.1623	24.1948	37.7404	38.5041	35.2442	34.9262	38.0037	38.1492	34.7201	39.3259	39.4022	39.443	39.4717	39.4264	39.4181	38.6029	39.0328	38.0881
6	48	12	1	4	35	19	32	13		36.2843	43.8554	42.2809	36.9667	18.7604	40.3207	37.4572	37.1601	43.478	42.9759	44.1062	44.7443	42.0088	44.9459	38.9813	49.9569	51.4248	49.7734	48.8741	48.3836	50.0772	49.901	38.4761	42.4574	48.4259	48.4127	47.7715	46.2618	48.553	48.5553	50.0036	49.3901	50.7567	51.432	50.1401	49.6964	49.8897	49.7215	49.9276	49.3626
18	60	12	1	3	26	14	27	16		22.9004	34.7129	34.6094	29.9118	15.1359	27.7441	30.8553	29.9546	30.5753	31.228	31.1139	30.8957	25.954	40.5799	16.8295	35.283	37.0918	40.3067	34.258	33.9437	34.0053	33.6714	21.6912	29.1362	40.5233	40.5248	36.7456	37.4635	40.5305	40.5492	39.4961	38.8063	39.1168	39.5158	39.3944	38.8352	39.4544	39.852	39.5463	39.6786
21	19	12	1	4	30	24	23	22		25.1993	39.0389	38.7202	16.4884	13.8378	24.2188	22.7748	26.8592	19.5672	19.5054	19.6073	19.7312	34.8772	41.0479	19.3241	38.7289	40.1489	42.1542	38.4776	38.901	38.9004	38.7276	21.8892	37.4146	41.6758	41.6906	40.28	40.4946	41.6925	41.6919	41.9578	41.8963	41.9501	42.0707	42.0105	41.8375	42.0928	42.2386	42.1635	42.2182
23	29	12	1	3	12	12	17	18		28.0336	36.3734	32.9159	31.3009	25.3786	30.3529	23.3261	23.3722	27.9947	27.1331	28.3708	27.447	38.4135	39.971	29.1674	39.0712	36.3679	40.0559	37.6449	36.8331	37.9594	37.6129	16.636	39.8793	41.9165	42.0991	42.3975	42.1815	42.356	42.2228	37.51	38.7471	39.2413	40.0272	40.0323	38.8411	38.9859	41.9294	44.7882	44.1074
27	37	14	1	0	19	16	19	15		28.3256	34.6861	33.1268	27.1321	15.535	28.1086	26.8589	39.1972	35.8206	35.4622	35.9229	36.0774	32.9817	38.5626	27.6662	43.1545	43.1947	43.0732	38.9919	38.831	39.8574	39.5642	16.3659	34.2906	41.915	41.9363	39.3684	38.3507	42.0659	42.0782	42.1489	39.1023	40.8104	41.8021	41.1952	40.5906	41.5372	41.6575	41.6535	41.5903
31	25	12	1	1	11	12	15	21		8.82473	21.8779	24.2388	22.1199	20.7924	22.1708	22.1399	22.6588	22.2407	22.3333	22.1818	22.1704	14.9796	27.006	13.1712	20.8787	10.8522	24.4967	27.183	25.2342	25.226	25.3913	9.00207	19.9431	21.0365	21.5882	18.3822	21.4353	22.0944	22.0478	8.82589	22.9372	27.0846	27.0676	27.1176	27.5242	26.3	26.2839	25.6939	26.3856
33	24	12	1	4	17	9	15	6		22.4339	20.8117	27.1933	28.6178	25.2124	30.6711	32.799	32.4659	31.9583	31.9458	31.9095	31.8997	20.9285	23.8909	28.8793	30.3799	26.6788	24.7331	25.6064	25.8047	26.1536	26.1791	32.2156	27.7833	18.8239	29.1431	29.5249	22.4364	24.8045	27.6011	25.3642	24.9037	25.0345	25.6209	26.3121	25.5017	24.4614	25.1175	25.6651	25.8969
36	46	12	1	4	22	15	21	14		22.0912	36.0864	35.6505	22.6311	14.6263	20.3595	20.2332	19.4449	31.246	32.0099	29.3657	16.9395	20.9837	18.6472	27.748	39.0258	38.3512	39.6816	35.552	35.65	36.3029	35.9307	14.3858	20.2022	37.3082	37.861	32.2711	29.7019	37.2747	37.6524	38.531	38.8138	38.5607	38.8901	38.4481	37.8779	38.9527	39.0571	38.5958	38.2675
39	19	12	1	3	26	14	24	11		20.3637	44.0149	44.1211	16.0912	11.6506	14.3821	16.2492	19.7862	18.7814	19.0551	18.8319	18.661	35.1971	43.1935	22.1506	43.4552	45.6441	45.6503	43.5507	43.5385	43.634	43.5139	35.2612	34.5094	44.5141	44.4629	42.4164	42.5747	44.5463	44.5324	44.7679	45.5949	45.5056	45.6096	45.5278	45.3976	45.6188	45.6547	45.6069	45.5761
42	36	16	1	5	25	13	21	13		27.2677	25.5401	30.8088	22.3029	26.7684	19.0023	11.4041	29.124	31.687	31.6855	29.5426	27.7435	30.6203	24.9344	23.8287	25.4498	30.3935	25.1018	31.7239	27.6425	27.3214	27.2918	11.017	24.8281	25.705	24.9401	25.0006	25.0691	25.3486	25.2278	30.906	26.4129	30.8105	30.2369	28.1942	26.1878	31.9431	30.1254	31.7395	29.4712
45	28	14	1	0	26	23	20	15		27.3322	29.3112	32.567	28.5983	36.2175	34.06	34.1547	34.8795	34.7585	34.7939	37.095	37.6349	19.7584	20.7835	8.33342	21.6226	22.5483	32.3196	19.5135	18.7647	18.8963	18.9749	18.8418	19.3241	26.6046	25.0395	24.775	23.129	27.6481	27.0711	30.3009	34.1823	30.9172	30.541	30.4861	29.4484	17.5343	34.0844	22.9277	28.1004
48	62	16	1	4	22	9	18	9		18.2061	31.6995	34.761	39.917	28.7619	18.093	42.7714	42.1771	38.8498	41.2061	22.6992	21.169	11.2824	43.2134	19.177	43.0007	33.6931	35.0849	36.0609	39.3866	38.5009	38.1223	37.2221	42.8508	44.3287	44.5452	44.1548	44.1625	44.2889	44.3775	44.9597	42.098	45.641	45.7705	45.7394	45.7101	45.7732	45.7719	45.8175	45.6572
52	28	14	1	0	25	32	24	32		28.8823	37.8405	36.969	36.2161	17.1114	31.352	35.0508	36.4623	40.5123	40.1528	40.9142	41.0179	40.5503	47.4998	35.0172	42.903	49.7394	48.129	43.9018	43.7712	44.8293	44.5939	41.3936	43.4515	48.0043	48.004	46.38	46.2131	48.1851	48.1938	48.5598	45.3243	45.4297	46.2064	45.6778	45.1915	46.2502	46.1813	46.2087	46.1172
54	23	14	1	1	23	24	25	21		32.6413	41.0421	42.3639	35.2578	16.0963	30.3911	28.1647	33.466	22.1181	21.8555	21.8221	21.6554	28.8397	46.2055	26.5819	40.3616	40.8683	45.8145	42.2545	42.3869	42.5049	42.4234	21.8683	41.3348	46.3773	46.3636	45.0129	45.2509	46.3833	46.3741	46.3544	45.4109	46.0139	46.2672	46.1041	45.9647	46.3784	46.3746	46.3085	46.2944
55	22	12	1	4	35	10	19	11		15.7436	23.4967	32.5716	23.3475	18.198	10.7214	26.2674	29.0528	34.2997	36.6873	33.8632	32.123	23.5964	40.2712	14.4031	30.7472	22.3656	40.4527	41.0551	40.4694	41.2909	41.4685	7.47249	28.7189	35.2217	37.6892	23.7657	34.3031	38.0454	38.2849	13.2594	40.1662	40.3369	40.5084	41.0537	40.8821	40.3124	38.6634	40.188	39.6981
7	37	16	2	0	35	30	29	29		31.8742	47.3007	46.8574	14.9159	13.7159	21.7113	19.7891	39.9433	26.4069	26.1409	29.4326	28.6041	20.8689	48.4412	24.8965	47.8017	48.4454	49.1875	46.7414	46.7699	46.7641	46.6388	24.6299	46.9623	48.4942	48.5983	47.2046	47.3738	48.5162	48.5289	48.5879	49.0086	48.7688	48.8696	48.7545	48.6015	48.8083	48.9366	48.8983	48.9104
10	41	16	2	2	22	19	21	22		19.2587	44.8495	44.878	36.1639	13.4241	18.4603	23.1497	27.8454	15.051	15.1718	15.4899	15.841	33.2196	44.4828	15.7984	42.5016	44.9407	46.0273	44.456	44.4168	44.5937	44.5468	24.9023	40.8392	44.063	44.2006	41.9154	42.3331	44.3211	44.3613	44.744	45.5377	46.1723	46.3442	46.3937	46.2902	46.4897	46.3795	46.4684	46.444
12	27	16	2	0	21	9	23	14		40.2742	44.8157	45.7549	35.6918	15.7535	26.8503	37.866	41.978	37.6491	37.83	37.5228	37.7542	44.7364	50.1755	31.2906	46.6676	51.2259	50.9421	45.7094	45.0679	45.2856	45.0672	40.9408	45.3985	50.0428	50.0771	47.7662	47.8942	50.1213	50.1144	50.8203	49.3178	49.4073	49.881	49.7294	49.3799	50.1775	50.2676	50.2308	50.2444
16	61	6	2	5	29	22	16	13		23.7603	46.4744	46.3667	15.6019	7.75639	10.7972	25.28	20.2424	34.5764	35.2133	34.7329	34.544	29.7884	46.4669	28.8674	47.7818	48.4742	49.0377	47.7774	47.785	47.8571	47.7135	20.6235	35.876	44.7021	44.8275	43.1311	44.3142	45.4448	45.4266	46.5428	48.0888	48.8701	49.0395	48.7507	48.5907	48.6427	48.7102	48.767	48.6984
17	32	16	2	3	16	9	21	11		14.9572	40.7969	40.1357	28.5869	6.6713	15.8001	21.8871	34.2732	24.0693	18.0268	29.9832	28.4951	33.308	38.9674	19.753	43.2251	40.6623	43.7732	41.7041	42.3734	42.8493	42.6331	22.447	40.3814	45.2453	45.4043	42.7508	42.2957	45.0131	45.0842	45.3157	44.6095	45.3039	45.8368	45.7177	45.3138	46.2533	46.0648	46.4699	46.2167
20	51		2	0	32	25	25	19		29.2931	46.6004	47.6791	31.0862	18.0385	23.0574	28.8012	33.2545	28.494	28.0503	27.8982	27.368	38.5916	43.8423	26.6899	41.8581	46.8838	49.1332	45.9999	45.7673	45.6908	45.4889	36.8494	43.2955	47.1096	47.1896	44.2433	43.7633	47.3369	47.3804	46.6449	48.261	48.8719	49.1341	49.0538	48.8436	49.205	49.0843	49.1396	49.0769
22	33	12	2	0	30	26	25	23		35.6107	36.0743	37.8356	25.2854	16.58	17.2216	27.3949	26.3749	17.7354	17.9438	19.5961	19.7508	33.9424	33.5406	25.9267	34.8824	40.8366	41.5955	32.4062	32.6627	33.5695	32.9976	35.7158	31.2912	41.6015	41.655	39.2201	38.0403	41.5784	41.6864	42.1742	39.5879	39.5663	40.2211	40.1888	39.5581	39.3826	39.4888	39.5087	39.4944
25	25	14	2	3	15	12	12	8		28.8249	26.4091	30.7242	31.1893	28.8939	31.2834	30.9915	31.0148	31.4186	32.9234	31.9731	31.7868	29.5842	34.837	17.869	16.0198	30.5494	34.6125	33.8662	36.7576	36.6005	36.5832	8.47061	14.4814	22.2972	38.4886	16.4187	17.3553	25.6009	30.6717	31.2026	37.4049	37.3021	37.3583	36.9437	37.4028	32.7352	37.1806	37.6252	37.681
29	35	14	2	3	18	11	16	13		13.8056	28.3752	34.6148	33.7264	15.0963	10.1584	22.2318	23.1105	21.9592	29.6026	32.3886	31.1371	21.1022	29.9835	14.6394	17.9051	21.9964	33.8825	38.9316	37.2141	37.4069	37.4238	15.7207	22.5395	32.2781	38.395	24.896	24.9025	23.48	29.5299	23.7058	36.1161	37.207	37.2881	37.491	36.9919	38.7089	37.1582	38.1796	37.2422
32	22	12	2	4	29	14	23	14		19.9971	41.8777	41.4039	8.08367	8.67566	13.8264	13.7097	16.0078	24.1272	24.3268	24.6386	24.8241	25.959	42.1257	26.5816	43.0622	42.1906	44.2758	42.5751	42.5961	42.7959	42.6843	17.8902	33.5156	41.0889	41.1146	39.2302	39.666	41.4002	41.3806	41.141	44.0233	43.9998	44.2078	44.0366	43.8372	44.2543	44.288	44.2815	44.288
41	32	14	2	3	23	16	23	15		10.2019	14.6319	23.8678	31.1189	11.18	22.0069	25.0223	24.4683	29.7806	27.3544	31.6332	33.2159	23.5237	20.6649	10.6215	13.908	28.1716	23.7742	32.9193	32.1023	32.2096	32.1348	13.4662	16.487	30.7795	33.527	19.6765	19.6012	20.5579	21.6596	28.0132	29.866	30.8967	31.274	31.7111	30.2436	32.4197	32.2331	33.0971	32.5303
43	53	12	2	3	16	8	13	9		15.7901	22.1786	25.4011	23.7274	13.7487	14.9841	14.365	14.1264	16.2224	17.9842	29.1028	29.6629	18.8194	23.9801	13.0114	18.0067	19.6276	25.4354	31.5347	30.9973	31.3734	31.4192	14.5164	14.5851	21.5896	31.5529	18.2167	19.9512	19.5465	23.1689	21.2226	28.1604	31.135	31.222	30.8698	30.9352	31.5598	29.9064	30.8011	31.1639
47	24	12	2	0	23	18	21	12		22.6222	42.6651	42.537	24.0092	10.3343	25.3294	16.8612	24.0829	27.6138	28.3894	28.055	27.7815	27.2945	41.47	22.637	42.0516	40.0466	45.229	42.0404	41.8481	42.0367	41.9141	15.6891	34.5894	43.3188	43.5435	38.8888	40.1219	43.3028	43.3643	42.6271	45.0719	44.3754	44.4927	44.433	44.1352	44.4508	44.3455	44.422	44.1452
51	21	12	2	2	23	22	23	22		28.3188	41.2584	40.4423	29.1404	19.281	31.928	37.7343	37.8937	35.9747	33.9653	36.5588	36.4117	38.2847	46.0381	23.4527	46.1437	47.2595	47.8157	44.2073	44.305	44.9422	44.8646	30.4833	42.2717	47.541	47.5594	45.5891	45.5474	47.6084	47.6172	47.511	45.8548	47.2879	48.0356	47.6634	47.4489	47.872	48.0812	47.9587	47.7697
53	24	12	2	3	8	12	11	16		23.8154	41.699	40.2216	13.7036	9.42847	19.4553	18.7071	32.0113	24.7718	22.3479	24.8708	18.5087	31.457	45.3536	27.7337	44.6839	45.1319	46.1336	43.4495	43.8273	44.1834	44.0867	16.1309	37.2652	44.9767	44.9671	43.5572	43.2802	45.118	45.1165	45.4944	45.1616	45.9427	46.347	46.2059	45.9626	46.3862	46.3785	46.3597	46.3585
56	42	16	2	3	8	5	7	6		14.8884	31.6036	30.9523	14.8127	12.5364	23.1571	25.9466	27.5264	26.1468	26.338	26.4281	26.4286	19.7184	23.4641	24.1395	33.3606	26.1967	34.968	31.5452	31.334	32.0278	31.8557	24.5541	29.6441	33.1338	33.1664	30.8643	29.8593	33.0846	33.1252	33.996	34.1082	34.3357	34.5905	34.5192	34.1635	34.6843	34.7202	34.7848	34.7891
[truncated: 519 more columns]

## Sheet: statitics_beta1
NO.	AGE	EDU	CLASS_1_conv_2_sham	PHYSICAL	PRE_HAMA	POST_HAMA	PRE_HAMD	POST_HAMD	PRE_STRENGTH	1	2	3	4	5	6	7	8	9	10	11	12	13	14	15	16	17	18	19	20	21	22	23	24	25	26	27	28	29	30	31	32	33	34	35	36	37	38	39	40
2	42	12	1	0	34	29	26	23		29.1699	46.34	45.6227	18.6139	20.146	19.4898	20.843	25.711	21.811	26.0217	24.7169	25.1925	30.5113	36.2049	27.671	44.9517	47.321	47.6619	44.986	44.6115	44.7046	44.5406	23.4512	22.8784	45.5335	45.6372	39.3008	37.6857	45.3949	45.4002	45.767	47.4366	46.5758	46.5774	46.368	45.9036	46.4178	46.4303	46.5333	46.3163
3	34	16	1	0	23	10	22	11		30.9946	45.8801	45.1706	23.1404	12.6207	20.1812	28.6678	12.1853	36.2452	36.198	36.3182	36.3627	41.4841	47.6777	32.4804	48.3484	49.3389	48.9416	46.7768	46.696	47.1116	46.944	35.1354	43.1751	48.6871	48.7038	48.1555	48.0063	48.827	48.8284	49.0369	48.3883	48.3026	48.6238	48.2161	47.9487	48.2705	48.4078	48.3195	48.2977
4	32	12	1	1	25	21	22	16		29.978	39.9525	39.3905	25.4507	13.7088	29.7406	21.5877	21.2463	33.9224	33.7781	34.2752	34.2241	35.8878	40.6578	29.3484	41.8666	42.2678	42.2395	39.9301	39.6832	39.8456	39.7024	33.9636	33.8338	40.9973	40.9299	39.8276	39.2375	41.1201	41.1163	41.8734	42.1687	41.2639	41.3693	41.6209	41.4553	41.8427	41.8975	41.8736	41.8381
5	23	16	1	3	10	13	9	7		18.3364	40.1007	40.1221	14.8228	16.9483	18.6275	24.2315	23.7432	25.0192	25.0255	25.0299	25.0365	26.8199	38.3246	23.1172	33.4904	36.6724	40.0416	39.1215	39.3899	39.2524	39.2197	21.1349	29.0523	38.4862	38.738	37.167	36.9531	38.7101	38.7549	36.4011	40.1401	40.1394	40.1545	40.1685	40.1812	40.1299	39.6838	39.9079	39.4123
6	48	12	1	4	35	19	32	13		44.2375	44.7439	43.5653	43.2726	31.55	45.7414	45.1935	44.8802	47.2763	47.1896	47.4514	47.6357	49.297	47.4974	45.8319	50.6601	53.2429	50.9742	49.5194	49.0385	50.6784	50.4815	48.6306	48.7057	51.3896	51.2371	51.657	50.8035	51.3777	51.3472	52.2749	50.8216	51.9485	52.5591	51.1186	50.6565	50.8163	50.702	50.9332	50.4753
18	60	12	1	3	26	14	27	16		22.8867	35.9137	36.6655	26.057	23.0674	23.7647	27.4987	28.8234	26.4064	27.1161	27.3212	27.0205	27.8963	38.4449	22.4357	34.8773	35.8587	38.5279	35.9636	36.2438	36.2117	36.0758	20.3869	32.7894	38.8962	38.8967	35.5183	36.0834	38.8636	38.8752	37.7923	37.259	38.4646	38.7165	38.8543	38.6698	38.8937	39.0945	38.9997	39.1032
21	19	12	1	4	30	24	23	22		23.3351	38.274	38.1737	13.5877	14.0007	21.5643	21.736	24.6781	20.8141	20.7706	20.8736	20.9884	33.0873	38.9702	21.2438	38.082	38.3569	40.8138	37.895	38.1501	38.1588	38.0337	20.5373	34.0837	39.6053	39.6214	37.7035	37.914	39.6849	39.6816	40.3287	40.644	40.669	40.7385	40.686	40.5622	40.7221	40.7772	40.7689	40.7631
23	29	12	1	3	12	12	17	18		24.2043	34.8738	33.2881	26.5904	23.6848	26.8999	23.9421	22.6917	25.4667	25.198	25.6669	25.0982	32.0899	34.9812	27.2123	37.3775	30.2161	38.5744	35.8883	35.4349	36.3018	36.0175	19.0132	35.2705	39.2215	39.3481	38.92	38.352	39.5805	39.4743	31.5364	37.6361	37.7575	38.3446	38.1992	37.3505	37.4321	37.8689	41.4466	40.604
27	37	14	1	0	19	16	19	15		34.6636	25.5583	24.9775	33.2613	25.1352	34.5631	36.7587	41.2531	39.6023	39.4742	39.6373	39.6885	36.8259	37.2781	36.1638	43.4237	43.1126	38.2017	33.5468	33.1118	34.9603	34.4652	27.4058	32.1212	40.8658	40.8574	38.8079	37.7847	40.941	40.9424	41.8258	30.6664	35.2002	36.9076	35.7589	34.8863	36.2238	36.472	36.4367	36.3637
31	25	12	1	1	11	12	15	21		11.561	30.6681	33.7342	26.8215	24.691	24.8696	26.7908	30.4572	27.5135	28.5891	27.563	27.433	22.6873	34.9706	20.8067	28.9758	25.1248	33.6317	35.4791	32.1167	33.439	34.1404	9.01936	28.0508	26.8054	27.8026	23.6353	29.4936	28.105	27.9535	22.708	30.4765	36.0527	35.9864	36.0151	36.3496	34.8818	33.4656	33.638	34.2011
33	24	12	1	4	17	9	15	6		21.9471	21.4941	21.0504	21.5669	25.418	27.4433	30.6955	30.3177	29.1361	29.1655	29.045	28.9383	20.0736	23.9747	26.6336	29.0013	24.3875	24.943	20.4213	24.5997	24.939	24.9839	29.2828	26.1363	14.2739	25.8756	26.7191	21.0091	17.1053	22.7948	22.4063	25.0056	25.0451	25.3993	25.5033	25.342	19.8774	24.507	20.7196	24.7744
36	46	12	1	4	22	15	21	14		23.0067	35.3655	34.7195	25.0868	12.2436	16.9836	21.8222	17.3633	30.9084	31.5974	29.4805	13.6173	18.5062	14.4501	26.4682	37.5281	37.0876	38.8287	35.6833	35.9015	36.3725	36.081	17.2701	22.4369	36.8588	36.9846	31.047	27.6701	36.8477	37.0485	37.6714	37.8199	37.323	37.5656	37.1429	36.7107	37.5574	37.6567	37.3331	37.3526
39	19	12	1	3	26	14	24	11		19.5875	43.3839	43.3885	16.4828	10.5562	12.4686	15.7607	18.8692	17.9933	18.12	18.0516	17.9519	32.368	41.1737	20.5593	42.4608	44.4732	44.3091	42.7134	42.5993	42.7022	42.6046	32.7494	34.1337	42.8436	42.8227	40.2316	40.4721	42.8277	42.8288	43.0466	44.5463	44.442	44.5118	44.4555	44.3414	44.5174	44.5345	44.5048	44.473
42	36	16	1	5	25	13	21	13		25.4699	26.3806	28.4229	23.8314	26.5291	21.8634	13.9047	27.557	31.595	32.0095	29.2566	27.4194	28.7661	28.1292	24.5276	29.012	28.1589	27.5704	29.274	26.8233	26.5087	26.4711	10.7627	28.6281	29.2055	28.6915	27.8321	28.0207	28.8312	28.7797	28.5012	27.5097	28.4236	28.0392	27.2622	27.3154	29.1286	28.3497	30.1053	27.9321
45	28	14	1	0	26	23	20	15		26.4328	29.9491	33.9268	30.6447	36.7098	33.5404	33.2537	34.1502	34.278	34.3337	37.3212	37.8791	19.1639	23.3316	11.9804	22.317	24.3628	31.9658	21.8111	20.5353	20.7864	20.9204	17.7593	21.1155	26.1536	25.3018	25.4499	24.4078	26.9908	26.6073	30.383	34.0452	32.2967	31.9856	31.9153	30.9945	17.9723	35.003	22.0727	29.9513
48	62	16	1	4	22	9	18	9		19.0361	30.5879	33.3035	36.0385	23.8612	13.4845	42.5647	41.2232	36.2244	39.1071	28.7671	15.7873	11.6493	41.9912	20.1383	42.4823	33.4863	33.7507	34.478	37.0608	36.5562	36.2592	36.1907	42.0967	43.8013	44.0584	43.494	43.6914	43.707	43.7842	44.9034	40.427	45.0536	45.3265	45.2894	45.1651	45.3832	45.1874	45.5275	44.9368
52	28	14	1	0	25	32	24	32		34.6281	42.641	41.5105	39.5249	18.3865	40.8842	39.3567	41.0047	44.4466	44.3597	44.7965	44.8698	43.0778	49.7097	37.76	48.7199	52.653	51.3761	48.8994	48.7089	49.6114	49.438	44.7784	45.7201	50.2534	50.226	49.0454	48.8967	50.4562	50.4508	50.9121	49.4666	49.7623	50.3571	49.9206	49.5697	50.3104	50.3022	50.2906	50.2049
54	23	14	1	1	23	24	25	21		34.5403	41.6513	43.1879	35.8806	20.4417	29.3013	29.9434	35.1945	23.4215	23.0357	23.0281	22.8276	32.9124	46.6676	24.3086	39.4521	41.3917	46.1916	42.4215	42.4311	42.4126	42.3638	23.7861	42.8594	46.5985	46.5882	45.7792	45.9637	46.6077	46.5983	46.6351	45.8398	46.3469	46.5496	46.4008	46.2794	46.6301	46.6463	46.5686	46.561
55	22	12	1	4	35	10	19	11		20.4607	26.6816	34.5315	30.647	21.575	17.4498	24.7368	27.5894	38.4647	40.4218	38.5292	37.5825	26.1644	42.986	21.1778	36.0231	30.1009	42.7222	43.7201	43.8186	44.5911	44.664	9.95367	26.2872	36.5835	39.9103	23.927	34.281	39.5916	40.3478	18.6156	43.0156	43.1941	43.5039	44.1337	43.8745	43.4193	42.3507	43.4568	43.1461
7	37	16	2	0	35	30	29	29		32.0078	45.3984	45.0181	18.2971	13.8213	24.7213	20.9624	37.2768	27.0161	26.9255	28.8165	28.4845	23.6638	47.6226	23.5105	45.8588	46.5594	47.953	44.245	44.3479	44.3238	44.159	22.7349	45.8516	47.496	47.608	45.8594	46.29	47.5129	47.5283	47.6612	47.6924	47.3859	47.5279	47.3824	47.1849	47.4836	47.6034	47.5661	47.5878
10	41	16	2	2	22	19	21	22		23.7772	44.9579	45.1788	40.755	12.4874	19.7625	18.5853	24.7638	19.2318	19.4949	19.9058	20.4151	33.4422	45.5995	14.8718	44.5601	46.2377	47.0663	45.1159	44.9741	45.098	45.029	20.3434	40.7289	44.8181	44.9349	42.1175	42.9304	45.0218	45.053	45.5902	46.5998	47.0458	47.1822	47.2372	47.1421	47.3282	47.2566	47.3179	47.309
12	27	16	2	0	21	9	23	14		43.3333	41.0197	41.9523	38.5669	15.68	29.9011	40.0726	43.2241	39.878	39.9521	39.796	39.8789	47.6978	51.5418	37.4418	45.3109	50.9171	51.1564	41.7116	41.0609	41.344	40.9721	44.0243	47.0877	51.1549	51.1683	49.4317	49.4731	51.2349	51.2281	51.6413	49.1235	48.9772	49.5992	49.2898	48.7512	49.8963	50.0724	49.965	50.0376
16	61	6	2	5	29	22	16	13		21.6192	48.0004	47.6651	12.6541	15.6646	13.8967	22.2182	18.8114	31.7283	32.6232	31.9136	31.678	30.3713	47.5992	24.6403	47.9424	48.8267	49.1039	48.6863	48.6366	48.7139	48.6232	21.968	33.9802	46.2907	46.3394	44.2406	45.6181	46.9522	46.9141	47.7132	48.7225	49.3071	49.4216	49.2839	49.1985	49.259	49.3071	49.316	49.29
17	32	16	2	3	16	9	21	11		16.3752	41.9561	40.931	24.25	6.26042	9.65268	13.8034	27.4608	31.6673	28.469	34.1495	32.8407	32.1352	37.3073	26.8668	44.3962	42.6324	44.2834	42.8075	43.0507	43.7208	43.5187	28.7391	37.3006	44.4552	44.5835	41.7198	40.9746	44.2099	44.2796	44.6506	45.0208	45.4429	45.912	45.7605	45.3573	46.0978	45.8548	46.1778	45.9926
20	51		2	0	32	25	25	19		30.9197	45.1456	46.0449	28.1649	10.1022	18.0969	32.3743	35.7693	28.6073	28.0054	27.9657	27.9686	38.7104	44.1863	21.6941	42.7296	46.1534	47.7049	44.6341	44.4385	44.4344	44.3234	35.2235	44.1952	46.9221	46.9583	44.9245	44.619	47.1477	47.171	46.531	46.6371	47.6221	47.9176	47.9734	47.7318	48.2454	48.0827	48.1865	48.1281
22	33	12	2	0	30	26	25	23		35.7909	35.3427	37.3666	24.4735	15.6702	16.8549	25.9903	23.4854	17.4336	17.6814	20.4682	20.4827	32.2849	31.0417	27.795	33.4382	40.1787	40.8523	32.0003	32.2243	33.0003	32.4416	32.8757	28.7362	41.1273	41.2098	37.8279	36.27	41.0333	41.1837	41.7067	38.8059	38.9291	39.5122	39.2988	38.7836	38.676	38.644	38.731	38.6524
25	25	14	2	3	15	12	12	8		27.7828	25.4992	29.2057	28.7647	30.3408	29.1839	29.0128	29.242	29.3395	30.6496	29.7934	29.6919	29.2538	32.885	12.393	16.5848	30.6773	32.8418	34.0562	35.5228	35.4932	35.436	6.31787	15.3128	21.2642	36.378	16.8674	17.4487	23.8474	27.8821	31.955	35.7532	35.7731	35.7593	35.8621	35.7986	33.7453	35.7217	35.9932	35.9101
29	35	14	2	3	18	11	16	13		14.6424	26.2905	34.721	32.4483	14.9455	8.51649	20.5241	21.3026	22.6435	28.2663	32.1458	29.7332	21.5851	29.3329	14.6222	19.0383	21.9413	33.4184	37.9039	36.748	37.0348	37.1111	15.5457	20.7962	31.6607	38.0674	23.7803	23.4286	22.7851	28.3571	23.1706	35.732	37.3351	37.439	37.5244	37.2314	37.5323	36.7868	36.9043	36.7762
32	22	12	2	4	29	14	23	14		22.0492	40.523	39.5968	13.2994	11.1152	11.0153	14.6171	15.0537	24.0655	24.3188	24.7392	24.9056	28.0946	41.5636	25.8996	42.6158	42.8669	43.6862	41.3843	41.5099	41.8005	41.6611	21.734	33.6507	41.6758	41.6867	40.0462	40.2579	41.9252	41.9113	41.9784	43.1063	43.121	43.412	43.1666	42.8974	43.5057	43.5907	43.558	43.5779
41	32	14	2	3	23	16	23	15		11.0753	14.2007	20.6567	31.0243	12.5602	21.2324	25.9178	26.3063	30.0021	26.7724	30.9153	32.3809	22.9122	22.6148	10.6093	17.0185	26.713	21.2223	30.2462	28.9611	29.0645	28.9505	11.7557	18.9948	29.1523	31.1874	23.1007	22.2834	23.1802	23.6634	26.8732	25.5557	27.1437	27.6407	28.2497	26.3855	29.1994	29.3981	30.6891	30.1045
43	53	12	2	3	16	8	13	9		17.3354	25.4651	27.5612	22.4547	14.0523	13.8924	18.8511	18.2791	20.7284	15.8599	26.1843	26.7731	22.3754	24.3497	17.1805	22.6281	22.325	27.619	32.2178	31.4678	31.9877	32.1128	18.1521	13.8483	21.1219	30.1344	21.6274	22.5198	23.1488	22.1247	25.2521	30.3296	32.9644	33.0321	32.769	32.7738	31.9989	30.1397	30.1182	30.9774
47	24	12	2	0	23	18	21	12		22.3853	42.8623	43.037	23.0594	10.8954	26.378	17.4114	23.1024	27.3177	27.9161	27.5622	27.3778	28.2951	41.6956	22.7422	42.0167	41.0419	45.6988	42.1519	41.8558	42.0118	41.9059	16.344	36.3535	43.2414	43.4638	38.9791	40.1265	43.1905	43.2477	42.8229	45.5414	45.0533	45.1413	45.0917	44.8417	45.0827	45.0029	45.0688	44.8235
51	21	12	2	2	23	22	23	22		30.8836	33.2122	30.5678	35.4489	34.7152	35.9289	39.9389	39.8113	37.7877	36.3444	38.0948	37.8927	40.931	47.6012	26.9965	42.628	48.542	45.9818	38.5981	38.6815	40.6221	40.3543	33.1559	43.8231	48.0628	47.7937	46.8253	46.7292	48.1484	48.0686	48.282	43.4637	45.3662	46.6559	45.8109	45.3016	46.3403	47.3455	46.8001	46.3678
53	24	12	2	3	8	12	11	16		34.7345	44.0049	42.2112	31.1481	26.9387	36.7834	30.2046	28.0201	38.6663	38.3191	38.8889	37.8906	39.0654	48.0582	39.307	48.7461	50.0627	49.2215	47.7782	47.923	48.3292	48.2375	26.5719	39.5417	48.4267	48.3367	47.3786	47.088	48.551	48.5177	49.2608	48.3745	49.0692	49.3839	49.1422	48.92	49.1995	49.3031	49.2242	49.1704
56	42	16	2	3	8	5	7	6		15.0703	31.8982	31.0986	13.058	12.1825	24.2326	24.9781	25.8474	26.5262	26.6085	26.7124	26.713	22.4264	24.3302	25.4062	33.7318	26.2743	34.7405	32.1746	31.7973	32.5188	32.336	26.93	28.6095	33.0369	33.0591	30.8759	30.1866	33.0427	33.0732	33.9756	34.1858	34.3959	34.5473	34.444	34.164	34.5438	34.5859	34.6264	34.6407
[truncated: 519 more columns]

## Sheet: statistics_beta2
NO.	AGE	EDU	CLASS_1_conv_2_sham	PHYSICAL	PRE_HAMA	POST_HAMA	PRE_HAMD	POST_HAMD	PRE_STRENGTH	1	2	3	4	5	6	7	8	9	10	11	12	13	14	15	16	17	18	19	20	21	22	23	24	25	26	27	28	29	30	31	32	33	34	35	36	37	38	39	40
2	42	12	1	0	34	29	26	23		35.3579	49.4766	49.3933	25.6319	28.1627	21.8121	35.0687	35.4403	30.9489	38.1165	30.8881	30.7353	39.5638	42.564	23.8636	46.0091	49.2064	50.1239	48.3766	48.004	47.9955	47.9499	36.6349	25.4742	47.7997	47.8644	43.8969	42.8615	47.7795	47.7856	47.9199	49.7496	49.3694	49.4001	49.4696	49.2627	49.4817	49.3042	49.4575	49.2862
3	34	16	1	0	23	10	22	11		29.268	42.9475	42.9005	30.0961	13.6631	26.809	22.2851	18.858	30.3391	30.5762	30.5817	30.6155	32.6141	45.3476	24.1409	42.3633	45.4797	46.7654	41.8993	41.8279	42.1804	41.9058	24.5183	36.5338	44.852	44.8898	44.9658	44.7606	45.3178	45.3205	46.1244	45.8921	45.2186	45.4045	45	44.7345	45.0129	45.1588	45.0783	45.0888
4	32	12	1	1	25	21	22	16		30.3766	36.8224	37.4507	28.157	27.8424	27.7377	31.7131	34.128	30.2563	30.2388	30.2301	30.2085	33.597	36.5788	29.6788	36.7323	37.1162	36.595	36.4159	36.4428	36.3753	36.4076	29.9143	37.5194	35.9865	35.946	35.5502	35.6612	36.0212	36.0261	36.0187	36.7828	37.7553	37.7213	37.5825	37.6321	37.4856	37.4616	37.487	37.4255
5	23	16	1	3	10	13	9	7		24.9398	38.8954	39.5663	10.5489	22.8197	19.6972	23.7914	23.7703	23.8841	23.8815	23.8628	23.8626	33.2579	38.1079	23.2856	29.6848	35.6484	38.3097	36.4929	36.7321	36.3521	36.4797	23.3893	30.1351	36.1396	36.1352	36.5387	36.2474	36.3999	36.365	34.9553	37.5182	37.5514	37.5553	37.6112	37.7189	37.4534	36.8607	37.1117	36.5652
6	48	12	1	4	35	19	32	13		48.069	49.499	48.7009	46.5808	32.1436	49.2927	46.8387	46.557	48.8472	48.7639	49.0781	49.3168	52.0443	50.8697	47.9713	53.0732	53.8955	53.3843	52.9147	52.6273	53.5752	53.4605	50.2363	51.9579	53.7083	53.531	53.9291	53.3981	53.7031	53.6693	53.849	53.4799	54.161	54.5255	53.6706	53.3984	53.4899	53.4144	53.5493	53.2333
18	60	12	1	3	26	14	27	16		21.2348	34.4784	35.0248	26.973	16.7822	18.006	27.1254	25.4407	22.9896	24.0334	24.4912	24.1643	25.9162	36.0008	18.9992	33.6995	33.9595	37.4931	34.2236	34.2288	34.2764	34.1534	19.9384	29.3739	36.8962	36.8877	32.5078	33.1293	36.8091	36.8253	35.4252	36.7078	37.2015	37.4356	37.4552	37.1602	37.4887	37.5629	37.493	37.5675
21	19	12	1	4	30	24	23	22		21.9761	38.374	38.8163	15.4267	17.2019	17.3323	25.523	28.6133	21.5043	21.8396	21.4491	21.4718	32.4847	39.2406	19.61	37.3738	37.3685	40.4783	37.8075	38.0236	37.9302	37.8469	24.8917	36.0849	40.1068	40.0988	38.478	38.5354	40.1624	40.1716	40.2391	40.2074	40.5027	40.6072	40.6163	40.5449	40.7193	40.665	40.7209	40.686
23	29	12	1	3	12	12	17	18		23.7974	39.1987	37.2977	25.7016	22.1989	26.2822	26.4952	24.9783	25.8009	25.8441	25.5628	25.7081	32.0979	34.9345	35.2943	41.4732	30.1817	42.6527	40.1213	39.7083	40.4497	40.197	30.6257	35.4192	41.1822	41.2514	39.7519	38.8692	41.4487	41.4168	31.6572	42.0866	41.8458	42.1814	42.0938	41.5219	41.6321	40.8184	43.1719	42.6952
27	37	14	1	0	19	16	19	15		40.2948	35.7808	33.7986	40.5983	20.4412	31.3564	41.2886	44.8127	43.1754	42.9645	43.2296	43.3029	42.1006	39.7953	42.3067	48.3993	47.2251	45.6496	43.3237	42.9604	44.2394	43.8666	35.459	34.339	45.1167	45.1061	42.5348	41.1195	45.1079	45.1214	46.4152	41.4405	44.3136	45.3083	44.4541	43.9346	44.5572	44.7487	44.6989	44.6544
31	25	12	1	1	11	12	15	21		24.6345	28.1483	38.924	32.3108	28.8252	29.805	34.0223	37.0185	34.5885	35.9603	34.6033	34.3882	26.853	40.1107	24.3053	36.3166	32.1079	32.1303	40.4834	37.8345	38.1692	38.8059	17.788	33.384	33.8486	34.7979	28.1096	35.1882	35.1683	35.0314	32.7349	26.286	40.8212	40.7706	41.0668	41.3346	40.1218	39.3028	39.3047	39.8657
33	24	12	1	4	17	9	15	6		24.9488	26.8105	24.8122	18.6652	23.3813	26.3019	29.4792	29.8353	29.4959	29.1368	29.3425	29.4985	23.8503	27.9504	25.9898	26.5889	25.4965	28.4949	21.157	29.1376	29.1085	29.1306	27.1175	22.5202	14.9482	27.0993	24.3044	24.4987	16.0566	22.953	24.5942	28.7316	28.7357	28.6068	28.6667	28.8996	21.511	29.3798	20.8007	28.7
36	46	12	1	4	22	15	21	14		37.0391	36.7768	37.8845	37.4525	23.3877	27.7599	33.6082	28.3832	36.9106	37.0246	36.6031	25.9749	27.1568	16.5407	31.8409	40.208	41.2309	41.2892	39.3638	39.3103	39.3591	39.2281	29.3781	34.4177	42.2384	42.2259	38.9776	35.8419	42.1871	42.2449	43.3376	39.2461	40.4705	40.7112	40.6779	40.4231	41.1324	41.0137	41.0019	40.9594
39	19	12	1	3	26	14	24	11		24.5451	45.2083	45.2764	24.0647	16.3015	19.6403	16.985	21.2752	18.6958	18.8664	18.8079	18.7486	36.2938	43.5051	20.8639	44.7284	46.4949	46.0487	44.6713	44.5982	44.6621	44.5897	36.8908	36.4766	45.171	45.1696	42.8093	42.9998	45.1488	45.1569	45.3643	46.2261	46.3419	46.4064	46.3631	46.2783	46.4011	46.4212	46.3949	46.3757
42	36	16	1	5	25	13	21	13		24.1456	27.9516	27.2348	26.9283	28.3273	25.0883	17.8472	31.6657	33.4879	33.6028	31.2587	29.6306	30.9872	31.606	27.7816	32.4145	27.5569	30.0864	29.3896	24.9489	24.9652	24.8645	14.6492	31.8033	32.5451	31.8543	31.5186	31.5641	32.1747	32.0728	28.2184	29.1289	27.2821	26.9199	28.3701	29.2973	28.7603	27.4063	31.1217	27.0853
45	28	14	1	0	26	23	20	15		25.3473	33.1194	35.736	27.6965	35.476	33.5226	34.0184	34.315	34.031	34.0323	34.7413	34.9131	22.921	31.1387	24.9515	28.3559	22.5263	29.1559	26.9056	29.1689	29.6757	29.9109	20.8722	28.1126	30.1657	30.0629	29.7362	29.2521	30.0636	30.0805	28.6381	31.8976	35.7333	35.6349	35.0402	35.2018	27.0564	35.963	26.5755	34.0469
48	62	16	1	4	22	9	18	9		36.3727	37.832	41.0429	44.496	27.3418	27.1053	45.9709	42.9944	30.8263	40.9961	27.6377	16.075	32.3529	41.2421	36.9747	45.1096	42.2752	39.1518	41.6571	43.9823	43.6518	43.4237	42.7233	44.116	41.9354	42.8908	40.4879	40.1478	42.4252	42.7061	47.0004	45.4187	48.7087	48.8244	48.7587	48.739	48.7394	48.7556	48.7695	48.6738
52	28	14	1	0	25	32	24	32		40.2477	45.9967	45.5882	40.721	38.4446	39.7412	42.0716	37.9338	42.1351	42.1779	42.4581	42.4516	47.0105	48.7602	41.0568	46.1558	49.4274	49.5457	47.8625	47.5368	47.7703	47.7386	45.1705	44.338	48.6515	48.5949	48.0988	48.0607	48.8538	48.8403	49.5863	48.3055	47.9494	48.1062	48.0117	47.855	48.1198	48.062	48.1071	48.0291
54	23	14	1	1	23	24	25	21		27.571	39.304	40.8127	25.7965	24.8205	16.51	34.6	36.505	30.9532	30.8749	30.5451	30.5339	38.1365	44.4247	25.3845	34.7335	32.5329	43.6391	38.9609	38.7528	38.1841	38.3349	32.4679	40.7726	44.5526	44.5414	43.5454	43.4555	44.5732	44.5718	44.1191	43.0666	43.8606	44.025	44.2738	44.1695	44.4752	44.3997	44.4493	44.4471
55	22	12	1	4	35	10	19	11		32.4243	39.8193	45.7359	46.0421	28.7596	25.6397	19.6149	27.6806	45.633	47.5383	44.7257	44.0032	38.201	50.5482	25.0186	47.5304	43.5272	50.567	50.8973	51.2115	51.6734	51.6925	18.4656	32.6965	47.0187	48.7512	36.2021	42.7665	48.552	49.0788	34.8245	50.8921	50.9976	51.1695	51.5642	51.3378	51.2215	51.0684	51.2816	51.2495
7	37	16	2	0	35	30	29	29		30.6153	47.654	48.0923	24.8925	24.5918	24.468	34.0864	42.2889	29.8632	29.7255	28.2114	28.1573	38.3869	48.3378	31.9458	47.4239	47.0472	47.3868	46.7722	46.5772	46.7756	46.8274	35.9279	48.1059	48.6807	48.6519	48.297	47.3841	48.8113	48.808	48.385	47.0524	47.8158	47.9209	48.1891	48.1094	48.1767	47.8422	48.0695	47.9423
10	41	16	2	2	22	19	21	22		50.2002	56.7898	57.1193	56.2211	41.938	17.0805	46.1949	49.0208	38.9599	38.6054	38.2403	37.8702	53.6602	57.2788	43.5987	51.0463	56.2268	57.2201	55.7672	55.746	55.8482	55.8436	47.4624	55.0807	56.1452	56.1147	56.1354	56.2822	56.4222	56.4133	56.8151	56.9833	56.887	56.9122	56.9159	56.864	56.885	56.8245	56.8795	56.8551
12	27	16	2	0	21	9	23	14		48.0002	47.7889	48.3077	42.7194	20.711	23.4878	38.0587	47.7197	34.6467	34.6834	34.4834	34.5595	51.5668	53.1391	39.7252	50.5579	52.062	53.103	48.5562	48.1887	48.2847	48.0949	49.6685	51.0108	53.3618	53.354	52.4605	52.4654	53.3881	53.3806	53.5955	52.3255	52.5221	52.7651	52.6032	52.4219	52.8606	52.9374	52.8768	52.92
16	61	6	2	5	29	22	16	13		10.9504	46.3722	46.2354	19.7396	13.932	13.5385	20.2046	20.0768	25.043	26.2712	25.1451	24.9465	22.1428	45.6476	18.2629	46.7692	46.8675	47.0047	47.0084	46.9875	47.0247	46.9819	17.8796	35.2051	44.3366	44.4057	42.8024	43.7958	45.0009	44.9734	44.9255	46.7933	47.1922	47.2562	47.201	47.1723	47.2043	47.2051	47.2187	47.2015
17	32	16	2	3	16	9	21	11		34.4373	46.2147	45.5908	16.9172	16.0691	23.5683	27.8394	23.4634	43.231	42.5219	43.5315	41.5216	41.809	46.3552	42.1362	49.7725	48.6174	50.4001	47.3151	47.2106	47.8821	47.7214	42.9396	43.1691	49.9394	50.0172	48.6289	48.2744	49.8766	49.9	50.1536	50.41	50.1763	50.615	50.3441	49.9789	50.5879	50.269	50.6168	50.4391
20	51		2	0	32	25	25	19		45.3197	54.9389	54.8643	41.211	24.3878	27.2077	48.3321	48.9943	45.6976	45.326	45.3325	45.4111	50.6921	54.5511	39.1952	55.237	54.1652	55.0864	55.51	55.4679	55.5191	55.5242	46.3464	55.2061	56.1037	56.1222	55.2545	55.2498	56.1827	56.1924	55.1978	54.2481	55.8729	56.0833	56.182	56.1032	56.3748	56.2615	56.352	56.3227
22	33	12	2	0	30	26	25	23		36.4714	36.8343	37.5066	27.4034	16.5995	21.9194	24.2699	16.5791	22.3883	21.188	24.4456	22.9993	29.8207	27.3386	34.6867	37.7506	41.9778	42.1317	35.7498	35.8168	36.328	36.0336	31.2249	23.2641	42.3471	42.3827	38.0465	35.9524	42.1772	42.2761	42.697	40.1599	40.8645	41.4141	41.3409	40.9336	40.8545	41.0483	41.009	41.0483
25	25	14	2	3	15	12	12	8		27.0795	34.3136	40.7917	39.7099	34.5566	39.9006	39.9817	40.4031	40.419	41.0128	40.6471	40.4626	29.2364	36.8029	9.83476	30.5435	29.6387	38.1268	27.9092	33.6867	33.1265	33.0258	9.38697	32.5583	34.8181	38.714	33.4341	33.7266	35.4099	36.5643	30.7006	37.7732	36.623	36.2874	34.9866	36.2044	29.5196	33.9998	35.6315	34.8789
29	35	14	2	3	18	11	16	13		31.1528	40.6847	40.008	28.6627	28.1591	11.4205	39.6313	39.2062	35.8208	41.4813	25.4527	28.8438	37.1583	41.9393	34.46	38.8847	36.4108	42.9038	40.996	42.8723	43.0903	43.1934	31.3352	38.9225	31.782	42.6819	40.7868	40.0729	39.9598	41.1887	38.2311	43.427	43.7364	43.7306	43.6906	43.7741	40.6333	42.3633	37.1265	41.5999
32	22	12	2	4	29	14	23	14		23.9264	43.3317	43.3928	24.3964	14.6024	14.0463	29.1895	29.7307	29.193	29.2283	29.256	29.26	37.7985	44.4624	26.7266	42.7151	42.2815	44.9512	43.8956	43.8917	43.8787	43.8731	25.2066	41.2313	44.6083	44.6151	43.8249	43.6975	44.6876	44.6781	43.9366	44.5739	45.1934	45.3396	45.3593	45.2981	45.4697	45.4367	45.4646	45.4553
41	32	14	2	3	23	16	23	15		24.183	26.7291	28.5895	28.1218	22.0577	24.2219	31.3511	31.7144	32.8441	27.3404	31.0071	31.0898	28.9818	35.1565	25.9506	32.0875	30.4007	34.28	31.1587	32.5061	32.4922	32.579	21.4459	30.8549	30.6739	30.6557	34.3312	33.5112	33.7241	33.4374	32.1034	33.8422	33.3123	32.929	32.6718	33.7195	31.4441	31.483	30.3947	30.9595
43	53	12	2	3	16	8	13	9		33.5863	39.7114	38.5243	30.342	23.9521	18.6479	35.3386	34.1421	35.245	16.1039	26.7568	26.0528	36.9822	37.5134	33.6201	38.5401	37.7686	40.0504	39.5904	38.6866	39.1065	39.2524	32.547	20.2138	37.7833	36.1904	36.506	36.9618	39.1314	37.3855	40.3491	40.8291	40.9088	40.8796	40.9953	41.0253	39.0547	37.2494	36.7574	37.3932
47	24	12	2	0	23	18	21	12		31.5226	44.3058	44.3555	31.426	14.1306	27.6088	22.4511	22.0281	29.681	30.054	29.7595	29.6338	37.0367	45.1051	29.4635	42.2168	44.3363	46.8368	43.3164	42.8848	43.0466	42.9489	22.3968	34.0898	45.175	45.2479	41.1252	42.841	45.2185	45.2303	45.434	46.4256	45.5233	45.5417	45.4608	45.2506	45.4178	45.2723	45.3725	45.0705
51	21	12	2	2	23	22	23	22		35.3322	43.0343	43.0733	24.39	15.3783	28.363	39.3423	41.7886	34.8922	33.2811	36.5861	36.7159	45.4736	47.9514	20.4638	47.244	46.1758	48.8532	46.251	46.3625	46.6753	46.6753	36.4276	45.7751	48.6548	48.6672	47.228	47.3714	48.6891	48.7	48.8835	46.7369	48.5852	49.0921	49.0025	48.8734	49.2805	49.3054	49.2972	49.1601
53	24	12	2	3	8	12	11	16		28.316	44.7089	44.0492	17.8039	16.4825	22.5493	18.0097	25.9128	27.1879	25.8384	27.8345	24.3753	35.4967	47.1621	31.7174	47.2379	48.2361	48.6918	46.8758	47.0167	47.2588	47.2151	17.883	35.5901	46.6089	46.6067	44.1173	43.7145	46.742	46.7398	47.245	47.563	48.1803	48.4798	48.392	48.2312	48.5499	48.4737	48.5114	48.5145
56	42	16	2	3	8	5	7	6		23.8202	37.1441	39.0657	25.7685	33.1048	36.9347	37.0701	38.026	37.0352	37.2079	37.0492	36.9669	40.2827	30.4628	36.3463	29.5548	24.2186	31.549	32.3011	33.8292	32.6556	33.146	39.5199	41.5329	39.2853	39.2859	40.659	38.4106	39.013	39.0016	36.25	32.8059	35.3977	36.65	37.2067	37.2376	38.1287	37.209	37.7363	37.5165
[truncated: 519 more columns]

## Sheet: statistics_beta3
NO.	AGE	EDU	CLASS_1_conv_2_sham	PHYSICAL	PRE_HAMA	POST_HAMA	PRE_HAMD	POST_HAMD	PRE_STRENGTH	1	2	3	4	5	6	7	8	9	10	11	12	13	14	15	16	17	18	19	20	21	22	23	24	25	26	27	28	29	30	31	32	33	34	35	36	37	38	39	40
2	42	12	1	0	34	29	26	23		33.764	47.8631	47.4678	17.7163	17.3942	15.2086	24.3123	28.5461	22.7866	23.5497	25.6418	25.8765	34.1769	38.2282	32.0946	45.3243	48.3396	48.9174	46.1969	45.8378	45.8205	45.6744	25.3308	18.3528	46.4544	46.562	41.0986	39.7514	46.3957	46.3962	46.9584	48.6621	47.685	47.6858	47.4911	47.0203	47.5535	47.5164	47.652	47.4122
3	34	16	1	0	23	10	22	11		30.8948	46.0082	45.74	24.8337	9.77845	22.2455	20.48	16.2309	32.8754	32.878	33.0685	33.0764	39.4416	46.5314	28.3476	46.8673	48.118	48.4056	46.7873	46.7702	47.0159	46.9008	31.1912	42.4036	47.4262	47.431	47.1819	47.0338	47.5897	47.5886	47.6835	47.7976	47.9412	48.1672	47.8792	47.7011	47.8772	48.0035	47.9308	47.9191
4	32	12	1	1	25	21	22	16		34.5871	39.4445	38.8118	28.5205	18.4538	27.9598	26.5987	26.2381	32.4228	32.2643	32.8681	33.033	39.0836	39.7549	31.0943	41.0414	41.9877	41.0383	39.0303	38.8445	38.9863	38.8785	36.6686	34.7338	40.3475	40.3326	39.7613	39.3778	40.484	40.4779	41.1253	40.8164	39.8232	39.9346	40.1321	40.008	40.312	40.2749	40.299	40.205
5	23	16	1	3	10	13	9	7		26.2352	38.6021	38.7234	11.5208	21.5492	15.0992	21.9825	21.5477	22.8276	22.7984	22.845	22.8482	30.7422	37.5538	24.1084	32.1001	36.4781	38.8692	37.5135	37.6231	37.4637	37.4312	22.7882	29.3234	37.5122	37.821	36.0243	35.9936	37.647	37.6992	36.4087	38.785	38.8393	38.8556	38.8761	38.8766	38.8337	38.3733	38.6151	38.0052
6	48	12	1	4	35	19	32	13		35.4392	45.4236	44.9076	33.2157	11.35	34.2813	34.7752	35.1197	40.5582	40.1597	41.1732	41.7255	43.1777	45.9945	36.0904	49.513	49.4932	48.8952	48.812	48.6345	49.6709	49.5514	40.4686	44.8649	48.6261	48.6557	48.024	47.173	48.6561	48.674	48.9623	48.7373	50.1054	50.5819	49.5544	49.3052	49.422	49.4007	49.4794	49.1936
18	60	12	1	3	26	14	27	16		21.5458	36.382	36.3422	30.1576	11.1539	26.3422	31.542	26.4011	30.7219	31.5063	31.3944	31.1366	24.8317	40.3815	18.7864	37.1504	37.1097	41.2199	36.6038	36.0711	36.1532	35.8434	17.7361	26.8547	41.0583	41.0515	36.7723	37.2314	41.0054	41.0271	39.8655	40.119	40.4646	40.7835	40.6493	40.2315	40.7634	40.9564	40.8101	40.8563
21	19	12	1	4	30	24	23	22		25.9799	39.3899	39.4679	12.9034	13.9222	20.8725	20.4288	24.5547	21.5755	21.3913	21.7278	21.8932	31.561	39.0624	21.9387	39.3577	39.7367	41.8498	39.156	39.4156	39.4025	39.2905	18.6438	34.5079	40.4462	40.4777	37.3913	37.7544	40.4823	40.4891	41.255	41.6452	41.6235	41.7003	41.645	41.5081	41.6801	41.715	41.7122	41.7175
23	29	12	1	3	12	12	17	18		20.8226	39.8441	38.0908	26.5697	21.632	27.7655	24.1739	22.5097	24.2846	24.411	24.4942	24.4032	35.1294	37.3022	35.964	42.243	32.8926	42.9449	40.8861	40.5012	41.2326	40.9873	29.5894	37.9421	42.3517	42.4186	41.3825	40.6644	42.5994	42.5379	34.8284	42.4294	42.3876	42.8162	42.6422	42.0334	42.0752	42.1997	44.8433	44.322
27	37	14	1	0	19	16	19	15		30.0777	40.1739	38.938	29.4331	10.6186	27.1831	29.3826	38.9497	35.8384	35.6542	35.9388	36.0422	36.3913	38.5553	31.1353	45.5687	43.7928	45.3987	43.9799	43.8157	44.507	44.3348	20.7346	33.3935	42.8889	42.8956	39.9664	38.6066	42.9817	42.9998	42.8426	42.766	44.2692	44.9096	44.4475	44.0946	44.5492	44.639	44.6402	44.5781
31	25	12	1	1	11	12	15	21		7.89189	19.3892	25.3308	19.39	19.9564	19.139	20.2953	21.5888	20.6591	21.3015	20.6288	20.5214	14.7541	24.7257	12.729	18.1829	14.7254	22.9771	25.9353	23.5559	24.3435	24.8827	9.48118	17.4938	18.2807	18.8298	16.2609	18.6406	19.0911	19.0535	11.6906	20.7066	25.202	25.003	25.2411	25.7681	24.3797	23.4898	23.6768	24.2001
33	24	12	1	4	17	9	15	6		28.9639	31.162	22.2366	16.1815	21.5506	31.444	33.5037	34.1361	33.8364	33.5044	33.7207	33.905	25.5077	32.4367	21.8695	24.5381	31.6985	32.313	25.3553	33.9976	33.5712	33.6408	24.9244	23.099	16.2817	30.8584	24.6038	29.8935	23.4151	29.7098	28.7277	32.4556	32.3134	31.9284	32.0817	32.5724	25.2587	33.9675	28.4168	31.6336
36	46	12	1	4	22	15	21	14		32.5486	38.7628	40.0245	34.9997	25.7107	17.0089	22.1493	29.6094	32.1599	32.8985	29.4601	16.6009	17.8688	12.7232	21.66	39.6451	39.7888	42.7384	40.6577	40.7666	40.7895	40.6558	23.6644	35.0219	42.1587	42.2889	39.3249	36.3084	42.1766	42.2841	42.4628	41.3803	42.4546	42.627	42.5003	42.2494	42.7832	42.7742	42.6655	42.6677
39	19	12	1	3	26	14	24	11		23.0553	46.4486	46.4377	21.2988	11.4905	13.9127	14.4666	16.5113	23.8379	24.0128	23.9174	23.7785	35.3723	44.272	26.7084	46.0929	47.332	47.1301	46.3718	46.27	46.3532	46.293	35.7382	35.5672	45.873	45.8519	43.5243	43.6635	45.8836	45.8834	46.0594	47.2063	47.2846	47.3475	47.3149	47.2478	47.3527	47.3313	47.3319	47.2995
42	36	16	1	5	25	13	21	13		24.3369	25.8822	28.3732	22.1222	27.2272	19.2771	15.1587	28.9812	31.3362	31.4491	30.0392	29.0701	29.1157	27.8997	21.5474	27.7159	27.4681	26.8026	29.3222	25.8149	25.6914	25.5829	9.23352	27.8401	28.9113	28.1507	27.8514	27.8638	28.4659	28.3564	28.361	27.2062	28.0698	27.6146	27.2098	26.9533	29.3676	28.5126	30.5836	28.2207
45	28	14	1	0	26	23	20	15		21.437	27.3054	31.0583	27.3944	33.7596	31.3754	30.9742	32.2034	31.7479	31.8176	34.6014	34.6922	16.0663	25.7296	16.5117	23.6665	18.1482	30.2994	21.0792	22.9866	23.3969	23.592	15.7469	23.0289	28.0634	26.9004	25.6481	25.4607	27.8428	27.5603	26.5876	30.4158	29.6705	29.4795	28.8242	28.6288	21.827	31.011	25.4257	27.4616
48	62	16	1	4	22	9	18	9		21.229	33.7541	36.4082	38.9485	27.7962	12.6413	42.0739	41.031	35.455	39.2399	24.4867	19.2097	12.8482	41.7902	22.7196	42.6482	36.2673	36.1583	37.3239	39.7727	39.2949	39.0226	35.8511	41.9767	43.0091	43.4577	42.5765	42.6558	43.0681	43.2213	44.6871	41.98	45.5946	45.735	45.6712	45.6332	45.6743	45.5802	45.7314	45.3765
52	28	14	1	0	25	32	24	32		31.9169	44.8902	44.0954	37.4644	12.7208	30.9861	38.1995	32.2345	41.0751	40.8339	41.5837	41.655	40.9752	46.9513	38.2381	48.7267	50.5968	49.852	48.8994	48.8138	49.2778	49.1927	42.2677	40.3386	47.8441	47.7971	46.5352	46.421	48.0679	48.0573	48.7091	48.8222	49.0489	49.3759	49.0339	48.8623	49.2155	49.2581	49.2195	49.1731
54	23	14	1	1	23	24	25	21		26.77	41.37	41.9825	31.2655	8.82257	19.7849	22.2459	26.345	18.5054	18.5502	18.2902	18.3026	28.3006	43.5565	24.557	40.9275	39.7268	43.8135	41.9888	42.056	42.0448	42.03	19.9901	38.176	43.7374	43.7214	42.13	42.3354	43.7527	43.7452	43.9642	43.6196	43.9632	44.1103	44.0545	43.9734	44.2201	44.1986	44.1794	44.172
55	22	12	1	4	35	10	19	11		42.2186	32.6537	47.9785	47.0304	34.4343	35.5973	50.7115	51.7287	54.6676	55.316	54.8073	54.544	46.3257	54.8625	43.7148	49.7963	47.5451	55.0209	55.7668	55.7874	56.2677	56.2727	35.7963	50.3807	54.1431	55.1198	46.461	52.8574	55.0185	55.2383	42.6856	55.5229	55.5668	55.7326	56.0984	55.8659	55.7049	55.1912	55.7334	55.5334
7	37	16	2	0	35	30	29	29		31.4731	46.6569	46.8816	15.8368	12.629	26.2277	17.5888	37.3049	27.4246	27.1969	29.4921	29.1228	20.1017	48.2881	25.249	46.4975	47.6378	48.923	46.0029	46.0303	45.9197	45.8115	19.6663	46.1881	48.1311	48.2489	46.3178	46.9894	48.173	48.1905	48.3231	48.5821	48.5293	48.6234	48.5636	48.4527	48.6435	48.6954	48.6808	48.6974
10	41	16	2	2	22	19	21	22		28.42	47.0395	47.2024	42.4679	19.8734	18.816	24.0951	29.8183	14.3337	14.4348	14.6356	14.8341	38.9034	46.9111	16.8812	44.7948	47.0938	47.9573	46.6565	46.5663	46.6912	46.6616	26.9747	44.3826	46.6334	46.753	45.5708	45.8953	46.7926	46.8318	47.0436	47.5522	47.9688	48.0907	48.1282	48.0597	48.1932	48.1042	48.1779	48.1519
12	27	16	2	0	21	9	23	14		39.3016	46.0793	46.3665	34.6978	11.1514	19.8982	34.5996	37.7784	34.3195	34.436	34.2385	34.3446	43.6932	49.6258	29.44	48.1331	49.3074	50.3231	46.9112	46.7063	46.8409	46.7326	38.0448	42.5258	49.1824	49.1902	46.4601	46.7999	49.3067	49.2889	50.1392	49.1616	49.5337	49.8312	49.6813	49.5187	49.959	50.006	49.9708	50.0036
16	61	6	2	5	29	22	16	13		20.3404	46.1633	45.8578	12.6212	6.92524	18.4879	20.4443	20.6632	29.2589	30.0427	29.4514	29.2674	22.7787	45.0513	22.316	47.1918	46.9476	47.132	47.5335	47.5556	47.6066	47.5217	16.8101	34.3244	44.7545	44.7981	43.1551	44.2983	45.3323	45.2993	45.4548	46.7885	47.8282	47.9536	47.738	47.6809	47.6982	47.7325	47.7314	47.717
17	32	16	2	3	16	9	21	11		33.1732	44.3785	43.1959	16.0855	15.1578	24.7173	30.2101	18.9201	39.8803	39.6762	39.6171	38.1211	40.6312	44.8358	39.8528	48.2491	47.742	48.178	45.5468	45.4482	46.319	46.1182	41.8967	38.0502	47.8331	47.8836	46.7321	46.5185	47.8421	47.8425	48.0582	47.8251	47.5503	48.1218	47.764	47.2633	48.1057	47.7923	48.287	48.1947
20	51		2	0	32	25	25	19		25.4261	45.0686	45.7086	31.0752	6.83656	21.7429	25.8594	26.375	28.0608	27.6063	27.5439	27.0132	34.5219	41.1301	22.2944	40.4878	44.9665	47.7373	43.8719	43.5717	43.5148	43.3746	34.9466	40.4987	45.2886	45.3458	42.2251	41.4935	45.5624	45.5982	44.5996	46.7909	47.2556	47.5123	47.5019	47.2658	47.7366	47.5518	47.6643	47.608
22	33	12	2	0	30	26	25	23		32.9819	37.6867	37.4975	19.4367	15.3224	15.6824	28.1838	23.4129	18.2317	18.3218	19.2598	19.9708	31.967	31.4772	26.3449	35.9974	40.7285	41.6292	33.3917	33.6015	34.4618	33.9991	32.7403	29.8597	41.3211	41.2829	38.3435	36.9751	41.3046	41.3291	41.5838	40.3834	40.2783	40.7008	40.8373	40.3739	40.2664	40.4629	40.4025	40.4708
25	25	14	2	3	15	12	12	8		24.8994	35.0816	39.0772	37.8506	31.2143	37.6499	38.2139	38.8209	38.7492	39.6938	39.1643	38.9645	26.6806	36.6918	11.8786	33.1124	27.4679	37.3463	28.458	35.3134	34.8395	34.8036	10.7295	33.1995	34.7848	38.3623	33.5157	33.5836	35.3831	36.4288	28.52	37.7885	37.1158	36.916	36.0137	36.9736	28.5263	35.2971	36.5488	35.9239
29	35	14	2	3	18	11	16	13		26.9139	38.2068	36.4585	26.5351	20.6472	8.09506	34.1605	35.3955	34.0547	37.4142	25.1475	25.7211	34.2929	39.6781	27.6907	36.7276	33.6328	40.7708	38.034	39.6925	40.1142	40.2798	27.1753	36.1036	29.7346	40.6154	37.5136	37.517	37.6402	39.0342	35.2889	41.185	41.2205	41.2034	41.1859	41.3834	37.1483	39.1501	33.7053	37.9876
32	22	12	2	4	29	14	23	14		22.3749	41.4494	41.3	17.5813	10.6239	13.001	23.9213	23.3902	27.3001	27.3902	27.456	27.491	32.4588	41.5103	24.7175	42.7914	42.3265	43.4087	42.7999	42.7271	42.8403	42.7864	24.7401	35.8034	41.4653	41.4629	40.0699	40.0653	41.6071	41.5882	41.6832	43.1135	43.3946	43.5454	43.3975	43.2896	43.4894	43.4891	43.4967	43.4899
41	32	14	2	3	23	16	23	15		10.0531	16.13	25.5234	32.6561	11.7037	24.7039	25.0064	22.0521	31.0221	29.3625	33.0328	34.2598	25.491	23.0477	12.3206	18.2419	30.7998	24.0331	33.3579	32.0257	32.262	32.2024	10.6592	18.9493	32.8507	33.66	22.1539	21.6075	22.856	23.4059	29.586	28.9844	30.5239	31.0303	31.3863	29.8579	32.0004	31.6697	32.7915	32.3155
43	53	12	2	3	16	8	13	9		16.8606	25.8631	29.9837	25.5316	14.5423	13.512	18.1124	17.3445	20.1328	15.8904	28.5387	28.7711	22.1544	25.3036	14.1293	22.7325	22.0681	28.5027	32.6493	32.7182	33.0178	33.0634	17.0969	15.3156	22.5891	32.0093	21.3995	22.3469	23.2854	23.6781	24.8071	31.4084	33.3035	33.2853	33.1351	33.1229	32.3544	31.6894	31.1742	32.5196
47	24	12	2	0	23	18	21	12		34.8168	48.2389	48.392	35.2419	10.2339	27.4837	16.0848	22.562	33.1073	33.6927	33.2583	33.0662	38.0162	46.3657	31.2117	47.0884	46.9865	49.3198	47.5608	47.2839	47.37	47.3346	18.3587	39.8347	47.1038	47.2385	43.2655	44.5599	47.1273	47.16	47.3629	49.4585	49.1627	49.1729	49.1505	49.0501	49.0921	48.9875	49.0506	48.8903
51	21	12	2	2	23	22	23	22		33.9167	42.5163	42.1723	21.8137	13.8173	23.2847	37.1719	38.8711	29.8475	28.2014	31.3529	31.5089	44.854	46.6133	15.3945	46.8182	45.5881	47.5115	45.5221	45.5381	45.9603	45.9475	34.4303	43.7524	47.6317	47.6313	46.409	46.4382	47.736	47.737	48.0062	46.1095	47.6499	48.1118	47.9038	47.7782	48.0406	48.1477	48.0949	47.942
53	24	12	2	3	8	12	11	16		17.6365	41.5346	39.9455	13.1116	9.32744	23.3037	16.5342	26.3233	26.988	24.7916	27.1651	22.3201	24.9911	43.658	26.7161	44.447	44.3975	45.5132	43.5755	43.6874	44.0954	44.0181	14.5338	32.7538	42.926	42.9292	40.0128	39.4332	43.1991	43.2018	44.0144	44.7463	45.5718	45.9416	45.8345	45.6232	46.0021	45.9318	45.9549	45.9471
56	42	16	2	3	8	5	7	6		25.5393	31.2573	32.2558	21.9339	18.0173	22.0111	34.7183	36.5225	30.497	30.5431	30.3807	30.2981	35.4682	29.9982	30.3839	29.8596	28.9008	33.3337	31.1008	31.2937	31.155	31.2588	36.8447	39.3067	37.1957	37.2001	38.6997	37.316	37.25	37.2554	36.5713	32.6645	34.6529	35.3301	35.5753	35.4114	35.9939	35.6467	35.9175	35.7995
[truncated: 519 more columns]

## Sheet: statistics_gamm
NO.	AGE	EDU	CLASS_1_conv_2_sham	PHYSICAL	PRE_HAMA	POST_HAMA	PRE_HAMD	POST_HAMD	PRE_STRENGTH	1	2	3	4	5	6	7	8	9	10	11	12	13	14	15	16	17	18	19	20	21	22	23	24	25	26	27	28	29	30	31	32	33	34	35	36	37	38	39	40
2	42	12	1	0	34	29	26	23		32.4221	46.8582	46.2804	17.421	16.0392	13.6863	23.5372	28.3183	20.2367	23.6047	23.5842	23.8575	32.2807	36.2208	30.4293	44.5595	47.2313	47.7718	45.3223	44.803	44.8783	44.7696	24.2385	18.2027	45.0636	45.2229	39.264	37.7206	44.984	44.9845	45.8345	47.3817	46.1341	46.1204	45.9203	45.4131	46.0046	45.805	46.0447	45.7127
3	34	16	1	0	23	10	22	11		26.7288	43.5351	43.096	18.1798	6.17864	17.1312	20.593	14.7471	30.0758	29.9715	30.1386	30.1754	33.7415	43.9152	25.7187	44.7931	45.4351	46.0616	44.5917	44.5574	44.9043	44.765	24.7104	38.1953	44.9476	44.9274	44.424	44.2035	45.2064	45.19	45.1689	45.4593	45.6349	45.9066	45.544	45.3265	45.5288	45.6759	45.5852	45.5581
4	32	12	1	1	25	21	22	16		29.9176	40.7552	40.1194	24.1726	12.7997	27.8921	23.9562	19.3426	35.5645	35.4169	35.817	35.5723	36.2736	41.0695	31.3909	42.6921	42.6462	42.8022	40.5276	40.3775	40.5125	40.3847	34.6967	34.1951	41.8105	41.7849	40.7458	40.1841	41.9589	41.9539	42.3623	42.6955	41.8945	42.0144	42.2128	42.0626	42.4259	42.4351	42.4349	42.2892
5	23	16	1	3	10	13	9	7		23.5627	37.3117	37.3359	11.6893	15.0263	14.349	21.8272	21.4619	23.2402	23.2322	23.2792	23.2872	27.3289	36.3481	23.3744	32.7527	34.8392	37.5887	37.0495	37.3233	37.3022	37.2213	21.642	28.5072	36.676	37.1514	34.8722	34.7154	36.7916	36.8776	35.3025	37.6623	37.7732	37.8036	37.8214	37.7924	37.7827	37.0639	37.4504	36.5759
6	48	12	1	4	35	19	32	13		37.192	45.2131	44.5694	34.9597	12.251	30.9515	38.7105	38.0723	43.1286	42.8248	43.5732	43.9705	44.7737	47.0007	40.4451	49.6049	50.0954	49.7848	49.122	48.9353	50.0597	49.9233	43.76	46.4012	49.8664	49.9068	49.3384	48.4318	49.8523	49.8865	49.6564	49.6125	50.7832	51.2705	50.2151	49.9174	50.0975	50.0998	50.2185	49.9278
18	60	12	1	3	26	14	27	16		20.5236	36.1699	36.1074	29.3478	9.83972	24.7251	31.7509	27.5349	30.3525	31.0343	31.0331	30.799	23.4726	38.9335	17.0046	37.2079	36.0155	40.8317	36.7636	36.3972	36.4423	36.1362	15.1041	28.2993	40.1267	40.155	35.1876	35.7034	40.0319	40.0643	39.0981	39.9904	40.4435	40.7603	40.5826	40.18	40.7097	40.8968	40.7596	40.7932
21	19	12	1	4	30	24	23	22		25.6287	39.1387	38.8337	14.6973	9.96096	21.6365	20.225	24.6651	19.3565	19.2679	19.3922	19.5646	31.0447	39.1974	21.6693	38.9841	39.5479	42.0247	38.4867	39.0085	39.0094	38.844	18.593	34.7725	40.7516	40.7984	38.4575	38.5922	40.7945	40.8004	41.4521	41.8344	41.7418	41.8547	41.7671	41.5628	41.8449	41.887	41.8954	41.9049
23	29	12	1	3	12	12	17	18		25.9843	33.7151	32.2554	27.132	25.1783	27.3432	24.7258	23.2929	26.696	26.5949	26.8995	26.6594	31.066	34.15	28.2207	36.514	29.4483	36.8214	35.3496	34.9503	35.6983	35.4465	18.2578	33.0122	36.2706	36.4226	36.5078	36.2598	36.6941	36.5654	30.6343	36.2135	36.5597	37.0574	36.8747	36.1984	36.181	35.7597	39.1394	38.3424
27	37	14	1	0	19	16	19	15		25.0512	38.9058	37.493	22.4899	8.56102	23.0988	29.4254	37.4801	36.8411	36.5888	36.9505	37.0685	35.6099	36.6653	33.0979	44.4583	39.8941	44.1142	42.7171	42.4784	43.2805	43.0975	22.9395	31.9803	41.82	41.8203	38.9203	37.4816	41.9187	41.9447	39.2875	41.536	42.8092	43.528	42.9731	42.5813	42.9932	43.1145	43.1242	43.0208
31	25	12	1	1	11	12	15	21		6.89881	22.6464	25.4929	19.6904	18.4804	19.0685	20.1772	20.3901	20.3286	20.9165	20.3504	20.2531	12.2121	23.4983	10.3477	12.8016	9.51466	25.0422	23.4744	22.7262	22.735	22.8498	10.4758	13.6965	15.4083	14.5404	16.0316	14.9521	15.064	14.9444	8.42081	23.8426	23.1293	22.9969	23.0433	23.2093	23.0936	22.7313	22.8372	22.904
33	24	12	1	4	17	9	15	6		22.2507	19.1528	25.4149	22.7787	24.8329	30.7414	32.9315	32.946	32.1653	32.0702	32.0933	32.1175	16.5723	22.2625	27.1219	29.3509	27.0519	23.1358	23.1376	25.6574	25.2225	25.1883	30.0341	25.1718	16.7978	24.0565	26.9581	22.0024	20.3048	23.143	23.439	24.1289	24.1117	23.9283	24.1159	24.1943	22.6877	27.2794	27.2116	24.1498
36	46	12	1	4	22	15	21	14		26.7037	35.2076	35.2824	25.8364	10.2463	14.6925	24.514	16.6978	31.1932	31.7284	29.5424	11.0696	21.1308	13.7552	28.6619	37.3448	36.9397	38.8805	36.3413	36.3365	36.5794	36.3471	21.6381	20.9001	35.4907	35.6241	30.5654	27.5332	35.7402	35.8805	37.4814	37.7414	37.5629	37.7567	37.4359	37.091	37.7669	37.8041	37.5909	37.4784
39	19	12	1	3	26	14	24	11		23.2742	44.9182	44.7813	19.393	8.00495	15.6571	13.2359	15.1049	25.1918	25.4276	25.283	25.1569	33.4475	42.7054	26.7558	44.1515	46.2883	45.9829	44.8798	44.8455	44.9697	44.866	33.8626	32.0317	44.7497	44.7357	41.9188	42.1944	44.8112	44.8126	45.113	46.0011	46.1859	46.3258	46.2501	46.1215	46.3529	46.3093	46.3133	46.2442
42	36	16	1	5	25	13	21	13		27.6978	26.0369	31.7095	20.669	30.2146	17.966	15.1915	30.1687	32.955	32.6734	31.4194	30.5306	32.0657	22.6098	18.7421	23.5077	31.0451	23.9411	33.2145	29.5108	29.2163	29.1215	10.0944	23.1508	24.2971	23.0388	23.0088	23.0931	23.4883	23.3082	31.9671	27.5261	31.635	30.8939	30.0386	26.8048	33.4092	32.074	33.7078	31.8288
45	28	14	1	0	26	23	20	15		30.3866	32.3123	35.724	33.061	39.4642	37.1941	38.1164	38.5459	38.0102	38.038	39.9396	40.0373	22.9796	22.5002	9.4969	25.1696	28.0641	35.2999	20.8467	18.2579	18.3928	18.4098	19.4279	25.0502	27.6192	27.9109	28.6047	28.4658	31.8548	31.0856	35.7471	36.3222	32.75	32.1932	32.2161	30.342	16.6497	37.0547	22.8765	29.0947
48	62	16	1	4	22	9	18	9		22.3272	29.7909	32.6155	36.7012	23.817	13.7039	40.6652	39.3952	34.4319	37.1073	23.7483	19.2068	11.6453	40.4023	23.156	40.687	33.0056	32.7962	33.7115	36.3895	35.8304	35.5265	35.8069	40.1809	42.0937	42.378	41.8424	41.9114	42.0277	42.1407	43.159	39.1151	43.4561	43.6527	43.5591	43.4825	43.5842	43.394	43.6777	43.1312
52	28	14	1	0	25	32	24	32		27.6978	42.1489	41.5571	30.7178	6.51798	22.36	34.3674	31.1418	35.5924	34.7642	35.4527	35.6227	37.8303	45.7099	36.2324	46.1866	48.2357	47.9744	46.4378	46.392	47.0326	46.9031	39.594	38.1952	45.9996	45.9528	44.5277	44.1267	46.2481	46.2288	46.8086	46.5565	46.9594	47.4237	47.0629	46.8042	47.3806	47.3727	47.3587	47.3051
54	23	14	1	1	23	24	25	21		28.8801	41.089	42.0152	32.4419	10.8513	23.8777	26.2741	30.7746	20.8122	20.6728	20.3732	20.3055	29.7266	44.3169	24.6978	40.1796	39.2262	44.4348	41.6359	41.7302	41.7163	41.6878	21.8653	39.8779	44.4762	44.4666	43.2534	43.514	44.4954	44.49	44.5732	44.2255	44.6877	44.8426	44.7763	44.6916	44.9324	44.9045	44.8893	44.8808
55	22	12	1	4	35	10	19	11		14.9634	28.7682	36.0348	28.2539	15.5151	13.3342	25.4467	28.666	37.9052	40.2579	38.1045	36.6929	24.6612	41.7034	17.1912	35.4294	22.5186	42.7467	42.7623	43.3406	43.8748	43.959	10.101	26.9705	36.3529	39.6706	23.4359	34.5088	39.4149	39.919	15.5623	42.9192	43.0629	43.2754	43.7289	43.5214	43.1653	42.3793	43.1783	42.9268
7	37	16	2	0	35	30	29	29		31.9836	43.9166	44.0529	11.355	13.3013	21.0034	16.9347	34.5881	28.6439	28.4068	30.3763	30.0094	15.7872	47.109	27.4298	44.6057	45.4593	47.5394	43.3054	43.5018	43.268	43.0625	14.8244	44.3901	46.8105	46.928	44.7593	45.2347	46.8867	46.9007	47.0344	47.107	46.953	47.109	46.9739	46.8087	47.1329	47.2394	47.1916	47.2394
10	41	16	2	2	22	19	21	22		10.2809	44.6795	44.7006	35.5102	8.11001	17.5604	18.5039	25.8918	18.6028	18.7052	19.2855	20.0344	25.629	43.7513	16.2588	43.1395	44.6764	45.8865	44.3507	44.3397	44.4449	44.3927	17.4312	39.0627	43.2709	43.5129	39.8082	40.8292	43.5046	43.5917	43.9393	45.4746	46.0368	46.2035	46.2417	46.1502	46.3641	46.2667	46.325	46.3799
12	27	16	2	0	21	9	23	14		36.3196	45.0983	45.2277	33.6958	9.21573	24.7479	32.0312	36.4112	34.7512	34.9251	34.6905	34.8374	43.3073	48.9229	28.0047	46.5495	49.2473	49.9046	45.3674	45.0085	45.1964	45.0459	38.8462	43.6544	49.1659	49.1946	46.6135	46.6469	49.2462	49.2352	49.2779	48.6133	48.8239	49.2116	49.039	48.7906	49.424	49.4261	49.4228	49.4635
16	61	6	2	5	29	22	16	13		26.08	45.8474	45.2808	10.92	6.16452	14.0251	24.8343	19.4764	34.9692	35.5435	35.0313	34.8624	30.9371	44.9765	30.7244	47.1125	46.7875	47.7172	47.4955	47.5238	47.6368	47.5061	23.0955	31.1766	43.9175	43.9073	42.033	43.3721	44.5497	44.5037	45.8172	46.8485	47.7385	47.9359	47.6214	47.4853	47.5179	47.543	47.6056	47.5154
17	32	16	2	3	16	9	21	11		17.8533	38.7078	37.3713	21.41	7.25291	13.1232	13.2032	23.3627	30.9718	28.6571	31.7754	29.0535	33.6925	35.5745	24.91	43.0493	41.7195	42.7959	40.0194	40.3132	41.1686	40.9358	28.1999	34.7545	42.7507	42.9684	39.6775	38.9063	42.5349	42.6272	43.2917	42.8889	43.524	44.2593	44.0126	43.442	44.6074	44.2235	44.7789	44.5049
20	51		2	0	32	25	25	19		30.6433	45.5326	46.2252	29.5451	6.61239	14.3357	25.3262	27.4854	22.6588	21.914	21.8993	21.6845	37.1108	41.7686	29.729	39.4598	44.9164	47.7776	44.3506	44.0187	43.8774	43.6854	34.6251	40.9451	46.0104	46.0641	42.7038	42.0279	46.2525	46.289	45.3077	47.1271	47.5694	47.7466	47.7029	47.5038	47.8614	47.6976	47.7872	47.7221
22	33	12	2	0	30	26	25	23		33.159	37.7962	38.0111	19.9885	14.825	14.1447	28.3726	25.7788	17.7045	18.1984	18.4508	18.7653	34.3363	33.3449	22.6184	35.7288	41.0745	41.9131	33.6265	33.9999	34.8008	34.3533	33.5792	31.4584	41.8704	41.8639	38.9288	37.7111	41.778	41.8442	42.1017	40.4149	40.4449	40.903	41.0683	40.6018	40.5722	40.7113	40.6868	40.7298
25	25	14	2	3	15	12	12	8		32.6393	30.5884	25.9435	25.0926	34.8323	25.6423	24.8923	25.1525	25.422	27.5132	25.8552	25.5881	34.1507	36.9268	14.8974	16.2443	35.6311	36.5092	39.1068	39.5081	39.4757	39.4346	6.37725	15.5441	19.9724	38.5388	16.6715	16.88	22.7658	26.7925	36.6573	39.0769	39.2383	39.2584	39.5626	39.3248	38.5099	39.418	39.3879	39.1298
29	35	14	2	3	18	11	16	13		13.737	28.1343	33.7401	31.3922	13.6161	7.67241	22.6903	23.2229	22.3771	27.9623	30.2624	27.3646	21.8603	30.2306	16.8744	20.0965	21.6621	33.9447	37.136	36.2051	36.3792	36.4675	16.093	22.497	30.2167	37.0099	25.3208	24.9629	24.0883	28.4686	23.166	36.4409	37.1134	37.09	37.2054	36.9608	36.6412	35.5652	35.6972	35.0607
32	22	12	2	4	29	14	23	14		21.0274	39.1587	38.8252	15.7429	8.8867	9.97433	21.1634	22.1981	23.1242	23.1999	23.2613	23.2958	30.865	39.8337	20.4826	40.771	40.0888	41.4461	40.5298	40.451	40.6455	40.5805	20.5162	35.1923	39.9363	39.9387	38.7052	38.7138	40.0797	40.0652	39.9143	41.1624	41.4094	41.5765	41.441	41.3161	41.567	41.5344	41.5655	41.5533
41	32	14	2	3	23	16	23	15		11.5069	14.2872	23.8145	30.7326	11.7909	19.5969	23.8657	24.2985	28.6975	26.1066	30.1742	32.1678	24.7491	19.1416	9.85598	12.2502	27.8394	24.8161	33.486	33.1765	33.3693	33.3052	8.98176	13.0102	31.1905	33.9651	16.5005	16.2959	20.9558	23.3013	26.4149	31.0691	32.0596	32.5915	32.9373	31.4073	32.3807	32.6341	33.6957	33.0721
43	53	12	2	3	16	8	13	9		13.2322	23.3013	27.3951	28.0803	12.4726	15.483	14.3904	14.8849	19.6505	18.6283	31.8981	31.9766	17.6057	23.1462	9.1008	17.9706	18.661	26.7351	32.8601	32.8414	32.9772	33.0035	12.5188	11.5623	22.4233	34.1756	16.4022	17.8071	18.8505	25.43	19.9215	29.8417	32.3417	32.3483	32.0457	32.0842	32.8698	31.9947	32.9062	33.3283
47	24	12	2	0	23	18	21	12		19.7972	43.5326	43.4236	19.7871	5.23043	19.8452	15.8442	23.7705	29.465	30.2584	29.9023	29.6086	26.7582	41.7674	22.5724	43.712	41.3114	45.427	43.188	43.0798	43.2213	43.1395	14.8631	36.7248	43.343	43.5445	38.9639	39.7724	43.3204	43.3751	43.0301	45.4407	45.1277	45.2066	45.1697	44.9789	45.1652	45.0789	45.1408	44.9393
51	21	12	2	2	23	22	23	22		24.4306	37.9771	36.6531	21.0768	7.97758	25.125	30.8641	32.2894	29.2052	27.5915	29.8156	29.7334	35.485	42.0632	21.9674	44.0522	42.2192	44.571	41.1775	41.0717	41.9649	41.8717	22.5021	37.6015	44.0268	43.9762	41.9561	41.7374	44.1583	44.1561	44.4832	43.068	44.4853	45.261	44.8147	44.5734	44.9788	45.1627	45.1043	44.7781
53	24	12	2	3	8	12	11	16		16.8425	40.6615	39.0475	14.5091	9.2839	15.4999	18.1474	25.8002	24.9063	22.6558	24.9145	20.0435	26.9353	42.2931	25.1365	43.6427	42.6092	44.2743	42.2403	42.2629	42.6893	42.6272	16.1571	31.4959	41.1946	41.244	38.4834	37.6384	41.5083	41.5262	42.6641	43.5257	44.0907	44.4854	44.3334	44.0869	44.4959	44.3438	44.4105	44.3717
56	42	16	2	3	8	5	7	6		18.8849	31.3728	30.5035	18.1831	11.6374	20.8623	23.8557	24.0735	26.9656	27.0729	27.1409	27.1343	17.5569	23.5032	25.8743	33.4062	26.5421	34.5311	31.959	31.4133	32.269	32.0932	24.1108	27.1289	32.7483	32.7791	30.1605	29.3585	32.6306	32.6689	33.7592	34.0843	34.0956	34.2839	34.1754	33.8231	34.3097	34.2293	34.385	34.3624
[truncated: 519 more columns]
